# Supplementary material
Source: PubMed Central journal article supplement (PMC3428957)

# Supporting Information

for

## A case study of empirical and computational chemical shift analyses: Reassignment of the relative configuration of phomopsichalasin to that of diaporthichalasin

*Susan G. Brown, Matthew J. Jansma, Thomas R. Hoye\**

*Department of Chemistry  
University of Minnesota  
207 Pleasant St. SE  
Minneapolis, MN 55455*

| <b>I. Contents of Supporting Information</b>                                                                                                              | <b>page #</b> |
|-----------------------------------------------------------------------------------------------------------------------------------------------------------|---------------|
| <b>I.</b> Contents of Supporting Information                                                                                                              | S1            |
| <b>II.</b> General Experimental Protocols                                                                                                                 | S2            |
| <b>III.</b> Line listed NMR spectral data for diaporthichalasin ( <b>7</b> )                                                                              | S2–S3         |
| <b>IV.</b> Tabulated NMR spectral data for <b>7</b> (Tables S1–S4)                                                                                        | S4–S7         |
| <b>V.</b> HMBC correlations in <b>7</b> (in CDCl <sub>3</sub> , Fig. S1); H18 multiplet analysis (Fig. S2)                                                | S8            |
| <b>VI.</b> Computational Protocols and Results                                                                                                            | S9            |
| <b>A.</b> Molecular mechanics and DFT calculations—general description                                                                                    | S9–S10        |
| <b>B.</b> Sample Gaussian input files for the DFT calculations                                                                                            | S11–S15       |
| <b>i.</b> Input file [from MMFS (MacroModel)] for DFT geometry optimization and energy calculation                                                        |               |
| <b>ii.</b> Input file for GIAO DFT NMR calculation                                                                                                        |               |
| <b>C.</b> Total electronic energies, free energies, and Cartesian coordinates for <b>10a</b> and <b>10b</b>                                               | S16–S21       |
| <b>D.</b> Table of computed isotropic chemical shifts (Table S5)                                                                                          | S22           |
| <b>E.</b> Description of data input into Goodman DP4 applet                                                                                               | S23           |
| <b>F.</b> Table S6 of chloroform data (analogous to Table 1 in manuscript)                                                                                | S24           |
| <b>VII.</b> References and Notes                                                                                                                          | S25           |
| <b>VIII.</b> Copies of <sup>1</sup> H and <sup>13</sup> C NMR spectra in CDCl <sub>3</sub> , <i>d</i> <sub>4</sub> -MeOH, and <i>d</i> <sub>6</sub> -DMSO | S26–S38       |

## II. General Experimental Protocols

$^1\text{H}$  and  $^{13}\text{C}$  NMR spectra were recorded on Bruker 850 (850 MHz), Bruker 500 (500 MHz), or Varian Inova 500 (500 MHz) instrument.  $^1\text{H}$  NMR chemical shifts in  $\text{CDCl}_3$  are referenced to TMS (0.00 ppm), in  $d_4$ -methanol to 3.31 ppm ( $\text{CHD}_2\text{OD}$ ), and in  $d_6$ -DMSO to 2.50 ppm ( $\text{CHD}_2\text{SOCD}_3$ ).  $^{13}\text{C}$  NMR chemical shifts in  $\text{CDCl}_3$  are referenced to TMS (0.00 ppm), in  $d_4$ -methanol to 49.0 ppm, and in  $d_6$ -DMSO to 39.52 ppm. The following format is used to report resonances: chemical shift in ppm (multiplicity, coupling constant(s) in Hz, integral value, and assignment). Coupling constant analysis was guided by methods we have described elsewhere.<sup>1</sup>

High-resolution mass spectra were recorded on a Bruker BioTOF II (ESI-TOF) instrument using PEG (MW 600) as an internal calibrant. A solution of **7** in methanol and then of the PEG-600 were plug-loaded into a 100  $\mu\text{L}$  syringe and injected into the ESI-TOF ionization chamber. Seven swaths of data (ca. 500 scans each) were analyzed, and the median value was recorded.

## III. NMR Spectroscopic Data for Diaporthichalasin (**7**)

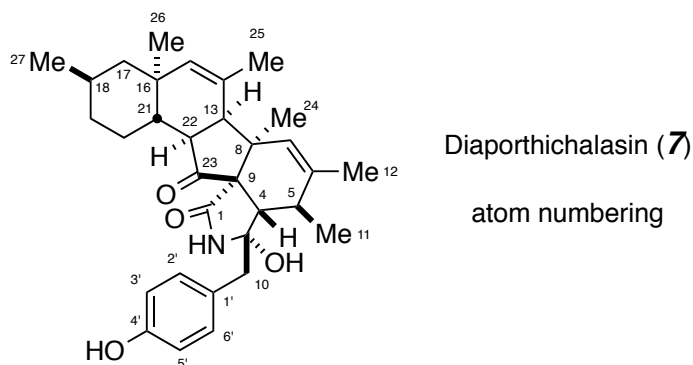

$^1\text{H}$  NMR (850 MHz,  $\text{CDCl}_3$ )  $\delta$  7.15 (d,  $J = 8.5$  Hz, 2H,  $H_{2'}/6'$ ), 6.84 (d,  $J = 8.5$  Hz, 2H,  $H_{3'}/5'$ ), 6.07 (br s, 1H, OH), 5.49 (br s, 1H, OH), 5.39 (dq,  $J = 1.9, 1.3$  Hz, 1H,  $H_{15}$ ), 5.32 (dq,  $J = 1.6, 1.6$ , 1H,  $H_7$ ), 3.12 (d,  $J = 13.5$  Hz, 1H,  $H_{10}$ ), 2.98 (d,  $J = 13.4$  Hz, 1H,  $H_{10}$ ), 2.98 (d,  $J = 8.0$  Hz, 1H,  $H_{13}$ ), 2.91 (d,  $J = 2.1$  Hz, 1H,  $H_4$ ), 2.44 (dd,  $J = 8.3, 12.9$  Hz, 1H,  $H_{22}$ ), 2.35 (s, 1H, NH), 2.35 (ddq,  $J = 2.1, 2.1, 0.9, 7.5$  Hz, 1H,  $H_5$ ), 1.88 (dd,  $J = 0.9, 1.4$  Hz, 3H,  $H_{25}$ ), 1.75 (dd,  $J = 0.9, 1.3$  Hz, 3H,  $H_{12}$ ), 1.72 (from HMQC, 1H,  $H_{19eq}$ ), 1.64 (dddd,  $J = 3, 3, 3, 13.5$  Hz, 1H,  $H_{20eq}$ ), 1.63 (from COSY, 1H,  $H_{18}$ ), 1.46 (s, 3H,  $H_{24}$ ), 1.45 (ddd,  $J = 1.9, 3.8, 13$  Hz, 1H,  $H_{17eq}$ ), 1.40 (ddd,  $J = 2.8, 12.7, 12.7$  Hz, 1H,  $H_{21}$ ), 1.21 (dddd,  $J = 3.5, 13, 13, 13$  Hz, 1H,  $H_{20ax}$ ), 1.01 (d,  $J = 7.4$  Hz, 3H,  $H_{11}$ ), 0.82 (s, 3H,  $H_{26}$ ), 0.82 (d,  $J = 6.5$  Hz, 3H,  $H_{27}$ ), 0.72 (dd,  $J = 12.4, 12.4$  Hz, 1H,  $H_{17ax}$ ), and 0.60 (dddd,  $J = 4.1, 13.1, 13.1, 13.1$  Hz, 1H,  $H_{19ax}$ ).

**$^{13}\text{C}$  NMR (125 MHz,  $\text{CDCl}_3$ )**  $\delta$  218.5, 175.1, 155.5, 139.0, 135.3, 131.2, 127.7, 127.1, 126.4, 116.2, 86.8, 64.8, 53.5, 50.4, 49.2, 48.1, 45.8, 43.8, 41.1, 36.0, 35.7, 29.4, 27.1, 25.6, 25.1, 23.4, 22.7, 22.4, 21.0 and 19.7.

**$^1\text{H}$  NMR (850 MHz,  $d_4$ -methanol)**  $\delta$  7.15 (d,  $J = 8.5$  Hz, 2H,  $H2'/6'$ ), 6.75 (d,  $J = 8.5$  Hz, 2H,  $H3'/5'$ ), 5.37 (dq,  $J = 1.9, 1.9$  Hz, 1H,  $H15$ ), 5.21 (dq,  $J = 1.4, 1.4$  Hz, 1H,  $H7$ ), 3.0 (br s, 2H,  $H10$ ), 2.86 (d,  $J = 8.0$  Hz, 1H,  $H13$ ), 2.73 (d,  $J = 1.7$  Hz, 1H,  $H4$ ), 2.25 (dd,  $J = 8.1, 13.0$  Hz, 1H,  $H22$ ), 2.09 (br q,  $J = 7.3$  Hz, 1H,  $H5$ ), 1.89 (dd,  $J = 0.9, 1.3$  Hz, 3H,  $H25$ ), 1.69 (dddd,  $\Sigma(\text{Js}) = 25.7$  Hz including  $J$ s of 1.8 & 12.7 Hz,  $H19eq$ ), 1.65 (s, 3H,  $H12$ ), 1.62 (ddddq,  $J = 4.1, 4.1, 12.3, 12.3, 6.5$  Hz, 1H,  $H18$ ), 1.53 (s, 3H,  $H24$ ), 1.52 (dddd,  $J = 3.3, 3.3, 3.3, 13.6$  Hz, 1H,  $H20eq$ ), 1.45 (ddd,  $J = 1.8, 3.8, 12.7$  Hz, 1H,  $H17eq$ ), 1.45 (ddd,  $J = 2.9, 12.7, 12.7$  Hz, 1H,  $H21$ ), 1.1 (dddd,  $J = 4.3, 13.2, 13.2, 13.2$  Hz, 1H,  $H20ax$ ), 0.81 (s, 3H,  $H26$ ), 0.81 (d,  $J = 6.5$  Hz, 3H,  $H27$ ), 0.81 (d,  $J = 7.3$  Hz, 3H,  $H11$ ), 0.68 (dd,  $J = 12.4, 12.4$  Hz, 1H,  $H17ax$ ), and 0.57 (dddd,  $J = 4.3, 13.2, 13.2, 13.2$  Hz, 1H,  $H19ax$ ).

**$^{13}\text{C}$  NMR (125 MHz,  $d_4$ -methanol)**  $\delta$  221.2, 178.2, 157.5, 139.7, 136.6, 132.7, 129.5, 128.0, 127.5, 116.1, 89.6, 66.1, 52.4, 51.9, 50.8, 49.5, 46.3, 45.2, 42.2, 37.0, 36.9, 30.7, 28.4, 26.3, 25.5, 24.5, 23.1, 22.7, 21.0 and 19.9.

**$^1\text{H}$  NMR (850 MHz,  $d_6$ -DMSO)**  $\delta$  9.25 (br s, 1H, OH), 8.59 (br s, 1H, NH), 7.09 (d,  $J = 8.4$  Hz, 2H,  $H2'/6'$ ), 6.67 (d,  $J = 8.5$  Hz, 2H,  $H3'/5'$ ), 5.64 (br s, 1H, OH), 5.32 (s, 1H,  $H15$ ), 5.08 (dq,  $J = 1.4, 1.5$  Hz, 1H,  $H7$ ), 2.87 (d,  $J = 14.1$  Hz, 1H,  $H10$ ), 2.85 (d,  $J = 14.1$  Hz, 1H,  $H10$ ), 2.73 (d,  $J = 8.1$  Hz, 1H,  $H13$ ), 2.48 (d,  $J = 1.4$  Hz, 1H,  $H4$ ), 2.04 (dd,  $J = 8.1, 12.9$  Hz, 1H,  $H22$ ), 2.03 (br q,  $J = 7.3$  Hz, 1H,  $H5$ ), 1.83 (dd,  $J = 0.8, 1.3$  Hz, 3H,  $H25$ ), 1.62 (dddd,  $\Sigma(\text{Js}) = 24.7$  Hz including  $J$ s of 1.2 & 12.2 Hz,  $H19eq$ ), 1.58 (dd,  $J = 0.8, 1.4$  Hz, 3H,  $H12$ ), 1.55 (ddddq,  $J = 3.9, 3.9, 12.8, 12.8, 6.4$  Hz, 1H,  $H18$ ), 1.47 (s, 3H,  $H24$ ), 1.41 (ddd,  $J = 1.7, 3.6, 12.6$  Hz, 1H,  $H17eq$ ), 1.37 (dddd,  $J = 3.4, 3.4, 3.4, 13.3$  Hz, 1H,  $H20eq$ ), 1.32 (ddd,  $J = 2.9, 12.8, 12.8$  Hz, 1H,  $H21$ ), 0.99 (dddd,  $J = 3.5, 13.4, 13.4, 13.4$  Hz, 1H,  $H20ax$ ), 0.75 (d,  $J = 6.4$  Hz, 3H,  $H27$ ), 0.74 (s, 3H,  $H26$ ), 0.71 (d,  $J = 7.4$  Hz, 3H,  $H11$ ), 0.58 (dd,  $J = 12.3, 12.3$  Hz, 1H,  $H17ax$ ), and 0.47 (dddd,  $J = 4.2, 12.9, 12.9, 12.9$  Hz, 1H,  $H19ax$ ).

**$^{13}\text{C}$  NMR (125 MHz,  $d_6$ -DMSO)**  $\delta$  218.8, 174.7, 155.9, 137.9, 134.7, 131.5, 128.8, 126.6, 126.1, 114.7, 87.9, 63.6, 50.0, 49.2, 48.6, 47.7, 44.1, 43.6, 40.3, 35.5, 35.3, 28.7, 26.6, 25.4, 24.9, 22.9, 22.6, 22.3, 20.0 and 19.9.

**HRMS (ESI-TOF):** Calcd for  $(\text{C}_{32}\text{H}_{41}\text{NO}_4\text{Na})^+$  526.2928. Found 526.2948.

**Table S1.** NMR spectral data for diaporthichalasin (**7**) in CDCl<sub>3</sub>.

| #                | $\delta_H$ (mult, J, Hz)              | COSY<br>H→ #                           | Carbon | HMBC<br>(H → C)       |
|------------------|---------------------------------------|----------------------------------------|--------|-----------------------|
| 1                | -                                     | -                                      | 175.1  |                       |
| 2                | not assigned                          | -                                      | -      |                       |
| 3                | -                                     | -                                      | 86.8   |                       |
| 4                | 2.91 (d, 2.1)                         | 5                                      | 53.5   | 3,5,6,7,8,9,11,2<br>3 |
| 5                | 2.35 (ddqq, 2.1, 2.1, 0.9, 7.5)       | 4,7,11                                 | 29.4   | 3,4,6,11              |
| 6                | -                                     | -                                      | 135.3  |                       |
| 7                | 5.32 (dq, 1.6, 1.6)                   | 5, 12                                  | 127.1  | 5,8,9,12              |
| 8                | -                                     | -                                      | 43.8   |                       |
| 9                | -                                     | -                                      | 64.8   |                       |
| 10               | 3.12 (d, 13.5)                        | 10                                     | 45.8   | 1',2'/6', 3           |
|                  | 2.98 (d, 13.4)                        | 10                                     |        |                       |
| 11               | 1.01 (d, 7.4)                         | 5                                      | 21.0   | 4,5,6                 |
| 12               | 1.75 (dd, 0.9, 1.3)                   | 5, 7                                   | 22.4   | 5,6,7                 |
| 13               | 2.98 (d, 8.0)                         | 15, 22, 25                             | 50.4   | 8,15,21,22,24         |
| 14               | -                                     | -                                      | 127.7  |                       |
| 15               | 5.39 (dq, 1.9, 1.3)                   | 13, 25                                 | 139.0  | 13,16,21,25           |
| 16               | -                                     | -                                      | 36.0   |                       |
| 17 <sub>ax</sub> | 0.72 (dd, 12.4, 12.4)                 | 17 <sub>eq</sub> ,18                   | 48.1   | 16,27                 |
| 17 <sub>eq</sub> | 1.45 (ddd, 1.9, 3.8, 13)              | 18,                                    |        |                       |
| 18               | 1.63 (from COSY)                      | 27                                     | 27.1   |                       |
| 19 <sub>ax</sub> | 0.60 (dddd, 4.1, 13.1, 13.1,<br>13.1) | 18,19 <sub>eq</sub> , 27               | 35.7   |                       |
| 19 <sub>eq</sub> | 1.72 (from HMQC)                      | 20 <sub>ax</sub>                       |        |                       |
| 20 <sub>ax</sub> | 1.21 (dddd, 3.5, 13, 13, 13)          | 19 <sub>eq</sub> ,20 <sub>eq</sub> ,21 | 23.4   |                       |
| 20 <sub>eq</sub> | 1.64 (dddd, 3,3,3,13.5)               | 20 <sub>ax</sub>                       |        |                       |
| 21               | 1.40 (ddd, 2.8, 12.7, 12.7)           | 22                                     | 41.1   |                       |
| 22               | 2.44 (dd, 8.3, 12.9)                  | 13,21                                  | 49.2   | 8,21,16,23            |
| 23               | -                                     | -                                      | 218.5  |                       |
| 24               | 1.46 (s)                              | -                                      | 25.6   | 7,8,9,13              |
| 25               | 1.88 (dd, 0.9, 1.4)                   | 13, 15                                 | 25.1   | 13,14,15              |
| 26               | 0.82 (s)                              | -                                      | 19.7   | 16,17,21              |
| 27               | 0.82 (d, 6.5)                         | 18                                     | 22.7   | 17,18                 |
| 1'               | -                                     | -                                      | 126.4  |                       |
| 2',6'            | 7.15 (d, 8.5)                         | 3', 5'                                 | 131.2  | 4',1', 3'/5'          |
| 3',5'            | 6.84 (d, 8.5)                         | 2', 6'                                 | 116.2  | 4',2'/6', 10          |
| 4'               | -                                     | -                                      | 155.5  |                       |
| OH               | 5.49 (br s)                           | -                                      | -      | 3,4,9                 |
| OH               | 6.07 (br s)                           | -                                      | -      |                       |

**Table S2.** NMR spectral data for diaporthichalasin (**7**) in *d*<sub>4</sub>-methanol (UMN).

| #                | $\delta_H$ (mult, J, Hz)<br>of "1" <sup>2</sup> | $\delta_H$ (mult, J, Hz)<br>of 7                                     | COSY of 7<br>H → #                     | Carbon of<br>"1" <sup>2</sup> | Carbon of<br>7 | HMBC of 7<br>(CD <sub>3</sub> OD, H → C) |
|------------------|-------------------------------------------------|----------------------------------------------------------------------|----------------------------------------|-------------------------------|----------------|------------------------------------------|
| 1                | -                                               | -                                                                    | -                                      | 178.2                         | 178.2          |                                          |
| 2                | -                                               | -                                                                    | -                                      | -                             | -              |                                          |
| 3                | -                                               | -                                                                    | -                                      | 89.7                          | 89.6           |                                          |
| 4                | 2.73 (d, 1.7)                                   | 2.73 (d, 1.7)                                                        | 5                                      | 52.4                          | 52.4           | 3,5,6,8,9,11,23                          |
| 5                | 2.09 (br q, 7.3)                                | 2.09 (br q, 7.3)                                                     | 4,7,11                                 | 30.7                          | 30.7           | 3,4,6,7,9,11                             |
| 6                | -                                               | -                                                                    | -                                      | 136.6                         | 136.6          |                                          |
| 7                | 5.20 (br s)                                     | 5.21 (dq, 1.4, 1.4)                                                  | 11,12,5                                | 127.5                         | 127.5          | 5,8,9,12,13                              |
| 8                | -                                               | -                                                                    | -                                      | 45.2                          | 45.2           |                                          |
| 9                | -                                               | -                                                                    | -                                      | 66.1                          | 66.1           |                                          |
| 10               | 2.99 (br s)                                     | 3.0 (br s)                                                           | 2'/6'                                  | 46.3                          | 46.3           | 1',2'/6',3,4                             |
| 11               | 0.81 (d, 7.4)                                   | 0.81 (d,7.3)                                                         |                                        | 21                            | 21.0           | overlaps w/ 26 & 27                      |
| 12               | 1.64 (br s)                                     | 1.65 (s)                                                             | 7                                      | 22.7                          | 22.7           | *overlaps w/ 19 but can<br>ca. 5,6,7,24  |
| 13               | 2.85 (br d, 8.0)                                | 2.86 (d, 8)                                                          | 15,22,25                               | 52.0                          | 51.9           | 7,8,14,15,21,22,24                       |
| 14               | -                                               | -                                                                    | -                                      | 129.5                         | 129.5          |                                          |
| 15               | 5.36 (br s)                                     | 5.37 (dq, 1.9, 1.9)                                                  | 13,20 <sub>eq</sub> ,25                | 139.7                         | 139.7          | 13,16,17,21,25                           |
| 16               | -                                               | -                                                                    | -                                      | 37.0                          | 37.0           |                                          |
| 17 <sub>ax</sub> | 0.67 (dd, 12.2)                                 | 0.68 (dd, 12.4, 12.4)                                                | 17 <sub>eq</sub> ,18                   |                               |                |                                          |
| 17 <sub>eq</sub> | 1.45 (m)                                        | 1.45(ddd, 1.8, 3.8,<br>12.7)                                         | 17 <sub>ax</sub> ,20,22                | 49.4                          | 49.5           | 16,18,21,26,27                           |
| 18               | 1.62 obsc                                       | 1.62 (ddddq, 4.1, 4.1,<br>12.3, 12.3, 6.5)                           | 17 <sub>ax</sub> ,27                   | 28.4                          | 28.4           | overlaps w/ 12                           |
| 19 <sub>ax</sub> | 0.56 (dq, 3.7, 12.7)                            | 0.57 (dddd, 4.3, 13.2,<br>13.2,13.2)                                 |                                        |                               |                |                                          |
| 19 <sub>eq</sub> | 1.64 obsc                                       | 1.69 (dddd, $\Sigma(Js) =$<br>25.7 Hz including Js of<br>1.8 & 12.7) | 18, 20 <sub>ax</sub> ,20 <sub>eq</sub> | 36.9                          | 36.9           | 16,21                                    |
| 20 <sub>ax</sub> | 1.1 (dddd, 12.7,<br>2.2, 2.4)                   | 1.1 (dddd, 4.3, 13.2,<br>13.2, 13.2)                                 | 18, 19 <sub>ax</sub> ,21               |                               |                |                                          |
| 20 <sub>eq</sub> | 1.5 (obsc)                                      | 1.51 (dddd, 3.3, 3.3,<br>3.3, 13.6)                                  | 15, 19 <sub>ax</sub>                   | 24.5                          | 24.5           |                                          |
| 21               | 1.42 (m)                                        | 1.42 (ddd, 2.9, 12.7,<br>12.7)                                       | 17 <sub>ax</sub> ,20 <sub>ax</sub> ,22 | 42.2                          | 42.2           | overlaps w/ 17                           |
| 22               | 2.24 (dd, 8.0, 12.7)                            | 2.25 (dd, 8.1, 13.0)                                                 | 13,17 <sub>eq</sub>                    | 50.8                          | 50.8           | 8,9,16,21,23                             |
| 23               | -                                               | -                                                                    | -                                      | 221.3                         | 221.2          |                                          |
| 24               | 1.52 (br s)                                     | 1.53 (s)                                                             |                                        | 26.3                          | 26.3           | 7,8,9,12,13                              |
| 25               | 1.88 (br s)                                     | 1.89 (dd, 0.9, 1.3)                                                  | 15                                     | 25.5                          | 25.5           | 13,14,15,26                              |
| 26               | 0.80 (s)                                        | 0.81 (s)                                                             |                                        | 19.9                          | 19.9           | overlaps w/ 11,27                        |
| 27               | 0.78 (d, 2.2)                                   | 0.81 (d, 6.5)                                                        |                                        | 23.1                          | 23.1           | overlaps w/ 11,26                        |
| 1'               | -                                               | -                                                                    | -                                      | 128.0                         | 128.0          |                                          |
| 2',6'            | 7.14 (d, 8.5)                                   | 7.15 (d, 8.5)                                                        | 3'/5',10                               | 132.8                         | 132.7          | 1',2'/6',4',3'/5',10                     |
| 3',5'            | 6.74 (d, 8.5)                                   | 6.75 (d, 8.5)                                                        | 2'/6'                                  | 116.1                         | 116.1          | 1',3'/5',4'                              |
| 4'               | -                                               | -                                                                    | -                                      | 157.6                         | 157.5          |                                          |
| OH               | -                                               | -                                                                    | -                                      | -                             | -              |                                          |
| OH               | -                                               | -                                                                    | -                                      | -                             | -              |                                          |

**Table S3.** NMR spectral data for diaporthichalasin (**7**) in  $d_6$ -DMSO.

| #                | $\delta_H$ (mult, J, Hz)<br>(2007 <sup>3</sup> ) | $\delta_H$ (mult, J, Hz)<br>(UMN)                                 | Carbon<br>(2007 <sup>3</sup> ) | Carbon<br>(UMN) |
|------------------|--------------------------------------------------|-------------------------------------------------------------------|--------------------------------|-----------------|
| 1                | -                                                | -                                                                 | 174.83                         | 174.6           |
| 2                | 8.58 (s)                                         | 8.59 (s)                                                          | -                              | -               |
| 3                | -                                                | -                                                                 | 87.99                          | 87.9            |
| 4                | 2.47 (s)                                         | 2.48 (d, 1.4)                                                     | 49.27                          | 49.2            |
| 5                | 2.03 (m)                                         | 2.03 (br q, 7.3)                                                  | 28.82                          | 28.7            |
| 6                | -                                                | -                                                                 | 134.77                         | 134.7           |
| 7                | 5.08 (s)                                         | 5.08 (dq, 1.4, 1.5)                                               | 126.13                         | 126.0           |
| 8                | -                                                | -                                                                 | 43.64                          | 43.6            |
| 9                | -                                                | -                                                                 | 63.62                          | 63.6            |
| 10               | 2.86 (s)                                         | 2.87 (d, 14.1)<br>2.85 (d, 14.1)                                  | 44.07                          | 44.1            |
| 11               | 0.71 (d, 7.2)                                    | 0.71 (d, 7.4)                                                     | 20.44                          | 20.0            |
| 12               | 1.58 (s)                                         | 1.58 (dd, 0.8, 1.4)                                               | 22.44                          | 22.3            |
| 13               | 2.72 (d, 8.0)                                    | 2.73 (d, 8.1)                                                     | 50.14                          | 50.0            |
| 14               | -                                                | -                                                                 | 128.13                         | 128.8           |
| 15               | 5.36 (s)                                         | 5.32 (s)                                                          | 137.95                         | 137.8           |
| 16               | -                                                | -                                                                 | 35.56                          | 35.5            |
| 17 <sub>ax</sub> | 0.58 (dd, 12.4, 12.0)                            | 0.58 (dd, 12.3, 12.3)                                             | 47.8                           | 47.7            |
| 17 <sub>eq</sub> | 1.41 (br d, 12.8)                                | 1.41 (ddd, 1.7, 3.6, 12.6)                                        |                                |                 |
| 18               | 1.54 (m)                                         | 1.55 (ddddq, 3.9, 3.9, 12.8, 12.8,<br>6.4)                        | 26.72                          | 26.6            |
| 19 <sub>ax</sub> | 0.46 (br q, 12.4)                                | 0.47 (dddd, 4.2, 12.9, 12.9, 12.9)                                |                                |                 |
| 19 <sub>eq</sub> | 1.62 (br d, 9.2)                                 | 1.62 (dddd, $\Sigma(Js) = 24.7$ Hz<br>including Js of 1.2 & 12.2) | 35.37                          | 35.3            |
| 20 <sub>ax</sub> | 0.98 (br q, 12.4)                                | 0.99 (dddd, 3.5, 13.4, 13.4, 13.4)                                | 22.99                          | 22.9            |
| 20 <sub>eq</sub> | 1.37 (m)                                         | 1.37 (dddd, 3.4, 3.4, 3.4, 13.3)                                  |                                |                 |
| 21               | 1.32 (dd, 12.8, 13.2)                            | 1.32 (ddd, 2.9, 12.8, 12.8)                                       | 40.34                          | 40.3            |
| 22               | 2.03 (dd, 12, 8.4)                               | 2.04 (dd, 8.1, 12.9)                                              | 48.75                          | 48.6            |
| 23               | -                                                | -                                                                 | 218.95                         | 218.8           |
| 24               | 1.47 (s)                                         | 1.47 (s)                                                          | 25.49                          | 25.4            |
| 25               | 1.82 (s)                                         | 1.83 (dd, 0.8, 1.3)                                               | 24.98                          | 24.9            |
| 26               | 0.74 (s)                                         | 0.74 (s)                                                          | 19.52                          | 19.9            |
| 27               | 0.75 (d, 7.6)                                    | 0.75 (d, 6.4)                                                     | 22.66                          | 22.6            |
| 1'               | -                                                | -                                                                 | 126.69                         | 126.6           |
| 2',6'            | 7.09 (d, 8.4)                                    | 7.09 (d, 8.4)                                                     | 131.6                          | 131.5           |
| 3',5'            | 6.67 (d, 8.4)                                    | 6.67 (d, 8.5)                                                     | 114.83                         | 114.7           |
| 4'               | -                                                | -                                                                 | 155.93                         | 155.9           |
| OH               | 5.63 (s)                                         | 5.64 (br s)                                                       | -                              | -               |
| OH               | 9.26(br s)                                       | 9.25 (br s)                                                       | -                              | -               |

**Table S4.** Summary of reported and recollected proton (left half) and carbon (right half) NMR chemical shift data for phomopsichalasin (once known as **1**)<sup>2</sup> and diaporthichalasin (**7**)<sup>3</sup> in three different solvents.

| Nucleus                | $\delta$ <sup>1</sup> H |                                     |                        |                       |                        | $\delta$ <sup>13</sup> C |                                     |                        |                       |                        |
|------------------------|-------------------------|-------------------------------------|------------------------|-----------------------|------------------------|--------------------------|-------------------------------------|------------------------|-----------------------|------------------------|
|                        | Sample                  | Diap.<br>CDCl <sub>3</sub> -<br>UMN | Phom.<br>MeOH-<br>1995 | Diap.<br>MeOH-<br>UMN | Diap.<br>DMSO-<br>2007 | Diap.<br>DMSO-<br>UMN    | Diap.<br>CDCl <sub>3</sub> -<br>UMN | Phom.<br>MeOH-<br>1995 | Diap.<br>MeOH-<br>UMN | Diap.<br>DMSO-<br>2007 |
| Atom #                 |                         |                                     |                        |                       |                        |                          |                                     |                        |                       |                        |
| <b>1</b>               | -                       | -                                   | -                      | -                     | -                      | 175.1                    | 178.2                               | 178.2                  | 174.83                | 174.65                 |
| <b>2</b>               | n/a <sup>a</sup>        | -                                   | n/a <sup>a</sup>       | 8.58                  | 8.59                   | -                        | -                                   | -                      | -                     | -                      |
| <b>3</b>               | -                       | -                                   | -                      | -                     | -                      | 86.8                     | 89.7                                | 89.6                   | 87.99                 | 87.86                  |
| <b>4</b>               | 2.91                    | 2.73                                | 2.73                   | 2.47                  | 2.48                   | 53.5                     | 52.4                                | 52.4                   | 49.27                 | 49.21                  |
| <b>5</b>               | 2.35                    | 2.09                                | 2.09                   | 2.03                  | 2.03                   | 29.4                     | 30.7                                | 30.7                   | 28.82                 | 28.74                  |
| <b>6</b>               | -                       | -                                   | -                      | -                     | -                      | 135.3                    | 136.6                               | 136.6                  | 134.77                | 134.68                 |
| <b>7</b>               | 5.32                    | 5.20                                | 5.21                   | 5.08                  | 5.08                   | 127.1                    | 127.5                               | 127.5                  | 126.13                | 126.05                 |
| <b>8</b>               | -                       | -                                   | -                      | -                     | -                      | 43.8                     | 45.2                                | 45.2                   | 43.64                 | 43.57                  |
| <b>9</b>               | -                       | -                                   | -                      | -                     | -                      | 64.8                     | 66.1                                | 66.1                   | 63.62                 | 63.57                  |
| <b>10a</b>             | 3.12                    | -                                   | -                      | -                     | 2.87                   | -                        | -                                   | -                      | -                     | -                      |
| <b>10b</b>             | 2.98                    | 2.99                                | 3.00                   | 2.86                  | 2.85                   | 45.8                     | 46.3                                | 46.3                   | 44.07                 | 44.06                  |
| <b>11</b>              | 1.01                    | 0.81                                | 0.81                   | 0.71                  | 0.71                   | 21.0                     | 21.0                                | 21.0                   | 20.44                 | 19.95                  |
| <b>12</b>              | 1.75                    | 1.64                                | 1.65                   | 1.58                  | 1.58                   | 22.4                     | 22.7                                | 22.7                   | 22.44                 | 22.33                  |
| <b>13</b>              | 2.98                    | 2.85                                | 2.86                   | 2.72                  | 2.73                   | 50.4                     | 52.0                                | 51.9                   | 50.14                 | 50.02                  |
| <b>14</b>              | -                       | -                                   | -                      | -                     | -                      | 127.7                    | 129.5                               | 129.5                  | 128.13                | 128.79                 |
| <b>15</b>              | 5.39                    | 5.36                                | 5.37                   | 5.36                  | 5.32                   | 139.0                    | 139.7                               | 139.7                  | 137.95                | 137.85                 |
| <b>16</b>              | -                       | -                                   | -                      | -                     | -                      | 36.0                     | 37.0                                | 37.0                   | 35.56                 | 35.48                  |
| <b>17<sub>ax</sub></b> | 0.72                    | 0.67                                | 0.68                   | 0.58                  | 0.58                   | 48.1                     | 49.4                                | 49.5                   | 47.8                  | 47.73                  |
| <b>17<sub>eq</sub></b> | 1.45                    | 1.45                                | 1.45                   | 1.41                  | 1.41                   | -                        | -                                   | -                      | -                     | -                      |
| <b>18</b>              | 1.63                    | 1.62                                | 1.62                   | 1.54                  | 1.55                   | 27.1                     | 28.4                                | 28.4                   | 26.72                 | 26.63                  |
| <b>19<sub>ax</sub></b> | 0.60                    | 0.56                                | 0.57                   | 0.46                  | 0.47                   | 35.7                     | 36.9                                | 36.9                   | 35.37                 | 35.29                  |
| <b>19<sub>eq</sub></b> | 1.72                    | 1.64                                | 1.69                   | 1.62                  | 1.62                   | -                        | -                                   | -                      | -                     | -                      |
| <b>20<sub>ax</sub></b> | 1.21                    | 1.10                                | 1.10                   | 0.98                  | 0.99                   | 23.4                     | 24.5                                | 24.5                   | 22.99                 | 22.91                  |
| <b>20<sub>eq</sub></b> | 1.64                    | 1.50                                | 1.52                   | 1.37                  | 1.37                   | -                        | -                                   | -                      | -                     | -                      |
| <b>21</b>              | 1.40                    | 1.42                                | 1.45                   | 1.32                  | 1.32                   | 41.1                     | 42.2                                | 42.2                   | 40.34                 | 40.26                  |
| <b>22</b>              | 2.44                    | 2.24                                | 2.25                   | 2.03                  | 2.04                   | 49.2                     | 50.8                                | 50.8                   | 48.75                 | 48.63                  |
| <b>23</b>              | -                       | -                                   | -                      | -                     | -                      | 218.5                    | 221.3                               | 221.2                  | 218.95                | 218.75                 |
| <b>24</b>              | 1.46                    | 1.52                                | 1.53                   | 1.47                  | 1.47                   | 25.6                     | 26.3                                | 26.3                   | 25.49                 | 25.39                  |
| <b>25</b>              | 1.88                    | 1.88                                | 1.89                   | 1.82                  | 1.83                   | 25.1                     | 25.5                                | 25.5                   | 24.98                 | 24.87                  |
| <b>26</b>              | 0.82                    | 0.80                                | 0.81                   | 0.74                  | 0.74                   | 19.7                     | 19.9                                | 19.9                   | 19.52                 | 19.94                  |
| <b>27</b>              | 0.82                    | 0.78                                | 0.81                   | 0.75                  | 0.75                   | 22.7                     | 23.1                                | 23.1                   | 22.66                 | 22.56                  |
| <b>1'</b>              | -                       | -                                   | -                      | -                     | -                      | 126.4                    | 128.0                               | 128.0                  | 126.69                | 126.59                 |
| <b>2'/6'</b>           | 7.15                    | 7.14                                | 7.15                   | 7.09                  | 7.09                   | 131.2                    | 132.8                               | 132.7                  | 131.6                 | 131.48                 |
| <b>3'/5'</b>           | 6.84                    | 6.74                                | 6.75                   | 6.67                  | 6.67                   | 116.2                    | 116.1                               | 116.1                  | 114.83                | 114.72                 |
| <b>4'</b>              | -                       | -                                   | -                      | -                     | -                      | 155.5                    | 157.6                               | 157.5                  | 155.93                | 155.86                 |
| <b>OH</b>              | 5.49                    | -                                   | -                      | 5.63                  | 5.64                   | -                        | -                                   | -                      | -                     | -                      |
| <b>OH</b>              | 6.07                    | -                                   | -                      | 9.26                  | 9.25                   | -                        | -                                   | -                      | -                     | -                      |

<sup>a</sup> n/a = not assigned.

## V. Figures S1 and S2.

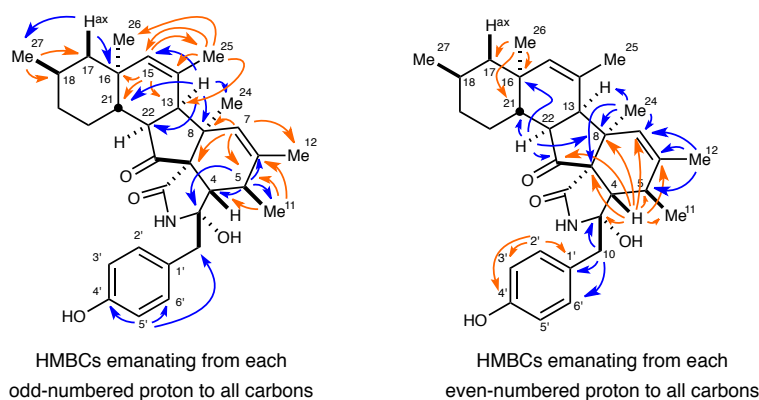

**Figure S1.** HMBC interactions observed for diaporthichalasin (**7**) in  $\text{CDCl}_3$ . Orange and blue arrows are used merely to help distinguish one set of correlations from another; they carry no additional specific meaning.

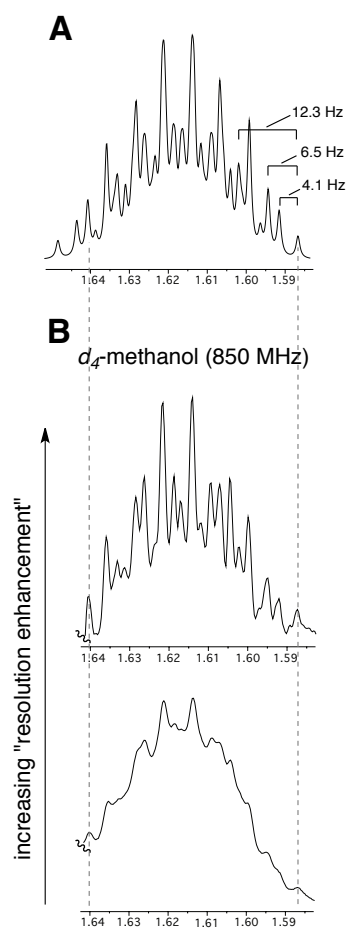

**Figure S2.** Panel **B**: Multiplet for the axial H18 proton in **7** (850 MHz,  $d_4$ -MeOH). Resolution enhancement allows determination<sup>1</sup> of the  $J$  values for this ddddq of 4.1, 4.1, 12.3, 12.3, and 6.5 Hz. Panel **A**: Simulated first-order multiplet using these deduced coupling constants.



## VI. Computational Protocols and Results

### A. Molecular Mechanics and DFT Calculations

Molecular mechanics calculations were carried out using MacroModel<sup>4</sup> as implemented in the Maestro<sup>5</sup> graphical user interface. Each of **10a** and **10b** was subjected to a Monte Carlo Multiple Minimum (MCMM)<sup>6</sup> conformational search where all minima within a 5.02 kcal•mol<sup>-1</sup> (21.0 kJ•mol<sup>-1</sup>) energetic window were retained. Each of these conformations was optimized with PRCG (500 steps) employing the MMFFs force field and the GB/SA continuum solvation treatment for chloroform.

DFT calculations were carried out using the Gaussian 09 electronic structure modeling platform.<sup>7</sup>

The conformational minima obtained as described were fully optimized at the density functional level of theory employing the hybrid meta-GGA functional M06-2X<sup>8</sup> and the 6-31+G(d,p) basis set. Frequency calculations conducted at the same level of theory provided the free energy values that were used to determine Boltzmann-weighted chemical shifts (where applicable). Solvation effects for methanol and chloroform were included by specifying the integral equation formalism polarized continuum model (IEFPCM).<sup>9</sup> The solute cavities were constructed using united-atom radii.<sup>10</sup>

Single-point GIAO NMR calculations were carried out with the hybrid GGA functional WP04<sup>11</sup> in combination with Jensen's pcS-2 basis set.<sup>12</sup> Solvation effects for methanol and chloroform were included by specifying the integral equation formalism polarized continuum model (IEFPCM). The solute cavities were constructed using Bondi radii.<sup>13</sup>

In order to calculate the chemical shifts for a particular structure, the isotropic chemical shifts for all unique proton nuclei ( $\sigma^x$ ) within that structure were referenced to the isotropic chemical shifts of the proton nuclei of tetramethylsilane ( $\sigma^{\text{TMS}}$ ) according to the following equation:

$$\delta_{\text{DFT}}^x = | \sigma^{\text{TMS}} - \sigma^x |$$

The values computed for  $\sigma^{\text{TMS}}$  (31.7699 and 31.7768 from calculations carried out with methanol and chloroform PCM solvation, respectively) were determined at the same level of theory. Isotropic chemical shifts for proton nuclei that were symmetry-related (i.e., methyl groups) were arithmetically averaged prior to being referenced.

In situations where more than one conformation merits consideration, the referenced chemical shifts are reported as a Boltzmann-weighted average ( $\delta_{\text{DFT}}^x$ ) across all conformers:

$$\delta_{\text{DFT}}^x = \frac{\sum_i \delta_i^x e^{(-\Delta E_i / RT)}}{\sum_i e^{(-\Delta E_i / RT)}}$$

In the above equation,  $\delta_i^x$  is the referenced chemical shift of nucleus  $x$  in conformer  $i$ ,  $\Delta E_i$  is the difference in free energy (sum of electronic and thermal free energies) between the  $i$ th conformer and the most stable (global minimum) conformer,  $R$  is the universal gas constant, and  $T = 298$  K.

Finally, the mean absolute error (MAE) was determined according to:

$$\text{MAE} = \sum_i^N |\delta_{\text{DFT}}^x - \delta_{\text{EXP}}^x| / N$$

where  $\delta_{\text{DFT}}^x$  and  $\delta_{\text{EXP}}^x$  are the computed and experimental chemical shifts, respectively, for nucleus  $x$ , where  $N$  is the total number of nuclei being compared.

**B.** Sample Gaussian input files for the DFT calculations.**i.** Representative Gaussian 09 \*.com file for geometry optimization and frequency calculation.

**M06-2X density functional** and the **6-31+G(d,p) basis set** with methanol solvation (for chloroform solvation, 'solvent=methanol' was replaced with 'solvent=chloroform'):

```
%NProcShared=4
%Mem=7900mb
%nproc=4
%chk=Diaporth_trunc_OPT_M062X-6-31+G-dp_MeOH.chk

# M062X/6-31+G(d,p) opt freq=noraman integral(ultrafinegrid)
scrf=(iefpcm,read,solvent=methanol)
```

GEOMETRY OPTIMIZATION/FREQUENCY CALCULATION WITH METHANOL SOLVATION FOR MODEL COMPOUND **10B**, STARTING FROM THE FOLLOWING INPUT GEOMETRY, WHICH RESULTS FROM THE INITIAL MCMM SEARCH.

```
0 1
C -5.993542 0.952039 -5.171179
C -5.764000 0.202437 -3.856289
C -5.707315 1.129910 -2.636173
C -6.917411 2.080734 -2.593839
H -5.102494 1.530195 -5.438189
H -6.123336 0.203607 -5.959751
H -6.573317 -0.527735 -3.723604
H -4.833980 -0.374362 -3.928494
H -4.788995 1.726202 -2.699113
H -7.826794 1.497371 -2.390329
H -6.803873 2.770150 -1.746141
C -7.232181 1.857710 -5.079577
C -7.584445 2.582938 -6.388224
C -8.900582 3.391860 -6.252487
C -9.169665 3.967023 -4.878024
C -8.357250 3.729847 -3.831271
C -7.101793 2.878379 -3.908259
H -8.072702 1.183580 -4.847628
H -6.772352 3.237450 -6.723608
C -5.927533 3.870155 -4.084999
H -6.069033 4.523688 -4.953332
H -5.833502 4.523613 -3.208519
H -4.964249 3.370131 -4.214540
C -5.624745 0.312198 -1.346506
H -5.540939 0.969921 -0.474945
H -6.513137 -0.314525 -1.213690
H -4.746979 -0.342548 -1.357730
C -10.372935 4.860129 -4.745094
H -11.293313 4.296405 -4.925530
H -10.447775 5.303924 -3.746627
H -10.317943 5.680749 -5.467685
```

|   |            |          |           |
|---|------------|----------|-----------|
| H | -8.568330  | 4.200425 | -2.871567 |
| C | -9.401943  | 1.665656 | -7.870504 |
| H | -9.804770  | 0.654489 | -7.958921 |
| H | -9.537371  | 2.220619 | -8.803222 |
| C | -9.997778  | 2.411941 | -6.690465 |
| H | -10.924170 | 2.922519 | -6.973924 |
| H | -10.242624 | 1.707364 | -5.885185 |
| H | -8.861169  | 4.220234 | -6.974561 |
| C | -7.938874  | 1.643103 | -7.525021 |
| O | -7.122179  | 0.959985 | -8.131984 |

radii=UA0

**ii.** Representative Gaussian 09 \*.com file for GIAO DFT NMR calculation.

**WP04 density functional** and the **pcS-2 basis set** with methanol solvation (for chloroform solvation, 'solvent=methanol' was replaced with 'solvent=chloroform'):

```
%NProcShared=4
%Mem=7900mb
%nproc=4
%chk=Diaporth_trunc_OPT_M062X-6-31+G-dp_MeOH.chk

# BLYP/GEN IOP(3/76=1000001189,3/77=0961409999,3/78=0000109999) NMR=GIAO guess=read
geom=checkpoint scrf=(iefpcm,read,solvent=methanol)

NMR CALCULATION WITH METHANOL SOLVATION

0 1

H      0
S      4      1.00
          0.754226E+02          0.406941E-02
          0.113499E+02          0.322324E-01
          0.259926E+01          0.150651E+00
          0.735130E+00          0.500000E+00
S      1      1.00
          0.231669E+00          1.0000000
S      1      1.00
          0.741474E-01          1.0000000
P      2      1.00
          0.960000E+01          0.181540E-01
          0.160000E+01          0.500000E+00
P      1      1.00
          0.450000E+00          1.0000000
D      1      1.00
          0.125000E+01          1.0000000
****
C      0
S      7      1.00
          0.785710E+04          0.642223E-03
          0.117865E+04          0.493018E-02
          0.268325E+03          0.255246E-01
          0.759483E+02          0.969662E-01
          0.245586E+02          0.278279E+00
          0.862118E+01          0.500000E+00
          0.312784E+01          0.369563E+00
S      7      1.00
          0.117865E+04          0.220880E-04
          0.268325E+03          -0.202720E-03
          0.759483E+02          -0.889512E-03
          0.245586E+02          -0.199457E-01
          0.862118E+01          -0.690043E-01
          0.312784E+01          -0.230090E+00
```

|      |   |              |               |
|------|---|--------------|---------------|
|      |   | 0.822020E+00 | 0.500000E+00  |
| S    | 1 | 1.00         |               |
|      |   | 0.330170E+00 | 1.0000000     |
| S    | 1 | 1.00         |               |
|      |   | 0.114628E+00 | 1.0000000     |
| P    | 4 | 1.00         |               |
|      |   | 0.219536E+03 | 0.971271E-03  |
|      |   | 0.337748E+02 | 0.202494E-01  |
|      |   | 0.767659E+01 | 0.138773E+00  |
|      |   | 0.223567E+01 | 0.500000E+00  |
| P    | 1 | 1.00         |               |
|      |   | 0.764466E+00 | 1.0000000     |
| P    | 1 | 1.00         |               |
|      |   | 0.262325E+00 | 1.0000000     |
| P    | 1 | 1.00         |               |
|      |   | 0.846377E-01 | 1.0000000     |
| D    | 1 | 1.00         |               |
|      |   | 0.140000E+01 | 1.0000000     |
| D    | 1 | 1.00         |               |
|      |   | 0.450000E+00 | 1.0000000     |
| F    | 1 | 1.00         |               |
|      |   | 0.950000E+00 | 1.0000000     |
| **** |   |              |               |
| O    | 0 |              |               |
| S    | 7 | 1.00         |               |
|      |   | 0.147824E+05 | 0.607282E-03  |
|      |   | 0.221733E+04 | 0.467273E-02  |
|      |   | 0.504741E+03 | 0.241672E-01  |
|      |   | 0.142873E+03 | 0.929122E-01  |
|      |   | 0.463005E+02 | 0.270386E+00  |
|      |   | 0.163373E+02 | 0.500000E+00  |
|      |   | 0.598281E+01 | 0.392630E+00  |
| S    | 7 | 1.00         |               |
|      |   | 0.221733E+04 | 0.904080E-05  |
|      |   | 0.504741E+03 | -0.170992E-03 |
|      |   | 0.142873E+03 | -0.136132E-02 |
|      |   | 0.463005E+02 | -0.192022E-01 |
|      |   | 0.163373E+02 | -0.817923E-01 |
|      |   | 0.598281E+01 | -0.233115E+00 |
|      |   | 0.167180E+01 | 0.500000E+00  |
| S    | 1 | 1.00         |               |
|      |   | 0.646621E+00 | 1.0000000     |
| S    | 1 | 1.00         |               |
|      |   | 0.216687E+00 | 1.0000000     |
| P    | 4 | 1.00         |               |
|      |   | 0.392755E+03 | 0.983308E-03  |
|      |   | 0.604239E+02 | 0.199046E-01  |
|      |   | 0.139351E+02 | 0.137896E+00  |
|      |   | 0.415313E+01 | 0.500000E+00  |
| P    | 1 | 1.00         |               |
|      |   | 0.141579E+01 | 1.0000000     |
| P    | 1 | 1.00         |               |

|   |   |              |           |
|---|---|--------------|-----------|
|   |   | 0.475491E+00 | 1.0000000 |
| P | 1 | 1.00         |           |
|   |   | 0.145292E+00 | 1.0000000 |
| D | 1 | 1.00         |           |
|   |   | 0.220000E+01 | 1.0000000 |
| D | 1 | 1.00         |           |
|   |   | 0.650000E+00 | 1.0000000 |
| F | 1 | 1.00         |           |
|   |   | 0.110000E+01 | 1.0000000 |

\*\*\*\*

radii=bondi

C. Total electronic energies [E(RM062X)], free energies (sum of electronic and thermal free energies), and Cartesian coordinates for **10a** (2 conformers) and **10b** (1 conformer).

i. METHANOL PCM solvation.

**10a—Conformer 1:**

SCF Done: E(RM062X) = -699.117102949

Sum of electronic and thermal Free Energies = -698.787921

---

|    |   |              |              |              |
|----|---|--------------|--------------|--------------|
| 1  | 6 | -0.000021337 | -0.000018190 | 0.000014195  |
| 2  | 6 | 0.000019355  | -0.000013904 | 0.000000074  |
| 3  | 6 | -0.000002603 | -0.000000907 | 0.000002901  |
| 4  | 6 | 0.000002954  | 0.000000505  | 0.000002233  |
| 5  | 1 | 0.000004717  | 0.000004725  | -0.000000251 |
| 6  | 6 | 0.000006964  | 0.000012953  | -0.000020327 |
| 7  | 6 | -0.000006789 | 0.000007191  | 0.000005979  |
| 8  | 6 | -0.000001040 | -0.000003849 | -0.000001085 |
| 9  | 6 | 0.000002739  | -0.000004061 | 0.000002085  |
| 10 | 6 | 0.000003080  | 0.000000327  | -0.000003808 |
| 11 | 6 | 0.000001226  | -0.000007037 | 0.000004767  |
| 12 | 1 | 0.000001107  | -0.000001407 | 0.000004122  |
| 13 | 1 | 0.000001525  | 0.000000534  | -0.000000461 |
| 14 | 1 | 0.000002785  | 0.000000780  | -0.000002647 |
| 15 | 1 | -0.000002667 | 0.000002647  | -0.000000071 |
| 16 | 1 | -0.000001149 | 0.000005288  | 0.000002395  |
| 17 | 1 | 0.000003600  | 0.000003175  | 0.000001394  |
| 18 | 1 | -0.000001312 | -0.000000967 | 0.000000526  |
| 19 | 1 | 0.000000691  | 0.000000704  | 0.000001112  |
| 20 | 6 | -0.000004866 | 0.000009762  | -0.000002097 |
| 21 | 1 | 0.000001263  | -0.000003944 | -0.000004775 |
| 22 | 1 | 0.000002002  | -0.000002568 | -0.000002004 |
| 23 | 1 | 0.000002183  | -0.000005102 | -0.000002643 |
| 24 | 6 | -0.000010732 | 0.000000622  | -0.000005097 |
| 25 | 1 | 0.000000916  | 0.000003484  | -0.000000536 |
| 26 | 1 | 0.000002481  | -0.000000633 | 0.000003010  |
| 27 | 1 | 0.000000641  | 0.000000249  | -0.000003021 |
| 28 | 6 | 0.000001300  | -0.000004168 | -0.000002889 |
| 29 | 1 | 0.000000627  | -0.000001635 | 0.000002007  |
| 30 | 1 | -0.000000274 | -0.000000586 | 0.000002520  |
| 31 | 1 | 0.000003047  | -0.000001384 | 0.000002468  |
| 32 | 1 | -0.000001477 | -0.000001637 | 0.000000470  |
| 33 | 6 | 0.000011661  | 0.000020604  | 0.000016075  |
| 34 | 1 | 0.000000332  | -0.000004618 | -0.000003437 |
| 35 | 1 | -0.000003923 | -0.000001003 | -0.000000276 |
| 36 | 6 | -0.000004842 | 0.000002947  | -0.000023996 |
| 37 | 1 | -0.000003985 | 0.000000324  | 0.000004479  |
| 38 | 1 | 0.000000373  | -0.000000715 | 0.000005920  |
| 39 | 1 | -0.000002016 | 0.000002011  | 0.000002406  |
| 40 | 6 | -0.000009779 | 0.000001476  | 0.000004784  |
| 41 | 8 | 0.000001222  | -0.000001993 | -0.000006501 |

---



**10a—Conformer 2:**

SCF Done: E(RM062X) = -699.114503903

Sum of electronic and thermal Free Energies = -698.785631

---

|    |   |              |              |              |
|----|---|--------------|--------------|--------------|
| 1  | 6 | 0.000014719  | 0.000077072  | 0.000039437  |
| 2  | 6 | 0.000019052  | -0.000028973 | -0.000040288 |
| 3  | 6 | -0.000026403 | 0.000028492  | -0.000007970 |
| 4  | 6 | 0.000004695  | 0.000007894  | 0.000005325  |
| 5  | 1 | -0.000001970 | -0.000012210 | -0.000004848 |
| 6  | 6 | -0.000034758 | -0.000008505 | -0.000021320 |
| 7  | 6 | 0.000038181  | 0.000010117  | 0.000034483  |
| 8  | 6 | -0.000013195 | -0.000027280 | -0.000014968 |
| 9  | 6 | -0.000001451 | 0.000002291  | -0.000004931 |
| 10 | 6 | -0.000003682 | 0.000005919  | 0.000011192  |
| 11 | 6 | 0.000018533  | -0.000014925 | 0.000019790  |
| 12 | 1 | 0.000004749  | 0.000011764  | 0.000011788  |
| 13 | 1 | -0.000003508 | 0.000003376  | -0.000005966 |
| 14 | 1 | 0.000005459  | -0.000009295 | 0.000010355  |
| 15 | 1 | -0.000006973 | -0.000003879 | -0.000014283 |
| 16 | 1 | 0.000000976  | 0.000001312  | -0.000001192 |
| 17 | 1 | -0.000005367 | -0.000011398 | -0.000004227 |
| 18 | 1 | -0.000011383 | -0.000003113 | 0.000012764  |
| 19 | 1 | -0.000002492 | -0.000000173 | -0.000006990 |
| 20 | 6 | 0.000018793  | -0.000002442 | -0.000016096 |
| 21 | 1 | -0.000007933 | -0.000001571 | 0.000002457  |
| 22 | 1 | -0.000001127 | 0.000002950  | 0.000001610  |
| 23 | 1 | -0.000005019 | 0.000002523  | 0.000006775  |
| 24 | 6 | -0.000001631 | -0.000006264 | -0.000009447 |
| 25 | 1 | 0.000001407  | -0.000003792 | 0.000003181  |
| 26 | 1 | 0.000001091  | -0.000003026 | 0.000000805  |
| 27 | 1 | 0.000002329  | -0.000000630 | 0.000002071  |
| 28 | 6 | 0.000008524  | 0.000001874  | 0.000012590  |
| 29 | 1 | -0.000003885 | 0.000000479  | -0.000003527 |
| 30 | 1 | 0.000005161  | 0.000000074  | -0.000007723 |
| 31 | 1 | -0.000005918 | 0.000000945  | 0.000001138  |
| 32 | 1 | -0.000001410 | -0.000004451 | 0.000003062  |
| 33 | 6 | -0.000022627 | 0.000015726  | 0.000077010  |
| 34 | 1 | -0.000004795 | 0.000006303  | -0.000015887 |
| 35 | 1 | -0.000001085 | -0.000003995 | -0.000012312 |
| 36 | 6 | 0.000007238  | -0.000007887 | -0.000037698 |
| 37 | 1 | 0.000005942  | 0.000000181  | 0.000002355  |
| 38 | 1 | -0.000000335 | -0.000005833 | -0.000001548 |
| 39 | 1 | -0.000002350 | 0.000002367  | 0.000008170  |
| 40 | 6 | 0.000024423  | -0.000041205 | -0.000066569 |
| 41 | 8 | -0.000011978 | 0.000019188  | 0.000031437  |

---

**10b—Conformer 1:**

SCF Done: E(RM062X) = -699.123397669

Sum of electronic and thermal Free Energies = -698.794624

---

|    |   |              |              |              |
|----|---|--------------|--------------|--------------|
| 1  | 6 | -0.000006082 | 0.000002184  | 0.000007319  |
| 2  | 6 | 0.000000382  | -0.000002155 | -0.000006069 |
| 3  | 6 | 0.000003940  | 0.000003151  | 0.000007850  |
| 4  | 6 | -0.000000112 | 0.000002441  | 0.000002383  |
| 5  | 1 | 0.000000626  | -0.000002182 | -0.000000036 |
| 6  | 1 | 0.000000489  | -0.000003023 | 0.000000104  |
| 7  | 1 | 0.000001138  | 0.000000926  | 0.000004771  |
| 8  | 1 | -0.000001060 | -0.000000535 | 0.000001804  |
| 9  | 1 | -0.000000437 | -0.000002545 | -0.000001154 |
| 10 | 1 | 0.000002458  | 0.000003657  | 0.000002645  |
| 11 | 1 | 0.000000984  | 0.000003194  | -0.000000361 |
| 12 | 6 | -0.000002223 | -0.000006726 | -0.000012247 |
| 13 | 6 | -0.000004085 | -0.000007507 | 0.000011320  |
| 14 | 6 | 0.000004896  | -0.000009283 | -0.000011175 |
| 15 | 6 | -0.000008875 | 0.000004500  | -0.000008525 |
| 16 | 6 | 0.000008052  | 0.000007637  | 0.000008132  |
| 17 | 6 | 0.000005979  | 0.000007860  | -0.000001206 |
| 18 | 1 | 0.000003587  | 0.000000640  | 0.000000121  |
| 19 | 1 | -0.000003100 | -0.000004970 | -0.000005071 |
| 20 | 6 | -0.000003863 | -0.000001447 | 0.000000773  |
| 21 | 1 | 0.000001865  | 0.000001384  | -0.000001924 |
| 22 | 1 | 0.000001930  | 0.000001899  | -0.000003697 |
| 23 | 1 | -0.000001595 | 0.000000940  | -0.000004629 |
| 24 | 6 | 0.000000635  | 0.000004444  | -0.000001161 |
| 25 | 1 | 0.000001555  | 0.000004698  | 0.000001084  |
| 26 | 1 | 0.000001586  | 0.000003741  | 0.000004020  |
| 27 | 1 | 0.000001054  | 0.000003128  | 0.000002236  |
| 28 | 6 | 0.000000263  | -0.000002464 | -0.000001435 |
| 29 | 1 | 0.000000516  | 0.000000265  | -0.000000366 |
| 30 | 1 | -0.000000588 | 0.000002690  | -0.000001940 |
| 31 | 1 | 0.000003291  | 0.000000685  | -0.000000325 |
| 32 | 1 | -0.000000932 | 0.000002770  | -0.000004893 |
| 33 | 6 | -0.000001551 | 0.000008469  | 0.000013034  |
| 34 | 1 | -0.000002913 | -0.000003724 | 0.000003275  |
| 35 | 1 | -0.000000687 | -0.000005760 | -0.000000268 |
| 36 | 6 | 0.000008790  | -0.000012351 | -0.000005817 |
| 37 | 1 | -0.000003017 | 0.000000756  | 0.000002218  |
| 38 | 1 | -0.000001777 | 0.000000832  | 0.000002594  |
| 39 | 1 | -0.000003321 | -0.000000272 | 0.000000846  |
| 40 | 6 | -0.000013129 | 0.000001560  | -0.000002141 |
| 41 | 8 | 0.000005330  | -0.000009506 | -0.000002087 |

---

**ii. CHLOROFORM PCM solvation****10a—Conformer 1:**

SCF Done: E(RM062X) = -699.115128310

Sum of electronic and thermal Free Energies = -698.785781

---

|    |   |              |              |              |
|----|---|--------------|--------------|--------------|
| 1  | 6 | 0.000010699  | 0.000045331  | 0.000034646  |
| 2  | 6 | 0.000017683  | -0.000019180 | -0.000016100 |
| 3  | 6 | 0.000007664  | -0.000002376 | 0.000008205  |
| 4  | 6 | -0.000008683 | -0.000005486 | 0.000010874  |
| 5  | 1 | -0.000000948 | -0.000010244 | -0.000008590 |
| 6  | 6 | -0.000008765 | -0.000024865 | -0.000009243 |
| 7  | 6 | 0.000004639  | -0.000001201 | -0.000001473 |
| 8  | 6 | 0.000001244  | -0.000003754 | -0.000002632 |
| 9  | 6 | 0.000000463  | 0.000005175  | 0.000001674  |
| 10 | 6 | -0.000002500 | -0.000003371 | 0.000003007  |
| 11 | 6 | 0.000007589  | 0.000005200  | -0.000002460 |
| 12 | 1 | 0.000000613  | -0.000001020 | 0.000004935  |
| 13 | 1 | -0.000000592 | 0.000002621  | 0.000000732  |
| 14 | 1 | -0.000002384 | 0.000003050  | 0.000001134  |
| 15 | 1 | -0.000000816 | 0.000003563  | 0.000000352  |
| 16 | 1 | -0.000000574 | 0.000002423  | 0.000000645  |
| 17 | 1 | -0.000000129 | 0.000000459  | 0.000002613  |
| 18 | 1 | 0.000000566  | 0.000002104  | -0.000000198 |
| 19 | 1 | 0.000000663  | 0.000002628  | -0.000000834 |
| 20 | 6 | -0.000004466 | -0.000005182 | -0.000005035 |
| 21 | 1 | -0.000000767 | 0.000001710  | -0.000001764 |
| 22 | 1 | -0.000000332 | 0.000004839  | -0.000001265 |
| 23 | 1 | 0.000001509  | 0.000000608  | -0.000000898 |
| 24 | 6 | 0.000003911  | 0.000003026  | -0.000001550 |
| 25 | 1 | -0.000000393 | 0.000000428  | -0.000000561 |
| 26 | 1 | 0.000001069  | 0.000002522  | -0.000002236 |
| 27 | 1 | -0.000000227 | 0.000000552  | -0.000000256 |
| 28 | 6 | 0.000002664  | 0.000007195  | -0.000003801 |
| 29 | 1 | 0.000000832  | -0.000001713 | 0.000000209  |
| 30 | 1 | -0.000002778 | -0.000004327 | 0.000003687  |
| 31 | 1 | 0.000002752  | -0.000003627 | 0.000001054  |
| 32 | 1 | -0.000004059 | -0.000000664 | -0.000003921 |
| 33 | 6 | -0.000033925 | 0.000003364  | 0.000016638  |
| 34 | 1 | 0.000005639  | -0.000002359 | -0.000003442 |
| 35 | 1 | 0.000008365  | -0.000000251 | -0.000002092 |
| 36 | 6 | -0.000005862 | -0.000002176 | -0.000012802 |
| 37 | 1 | 0.000001196  | -0.000001311 | 0.000004654  |
| 38 | 1 | 0.000001892  | -0.000001199 | 0.000002221  |
| 39 | 1 | -0.000000213 | 0.000004861  | 0.000003438  |
| 40 | 6 | -0.000002924 | 0.000001791  | -0.000014033 |
| 41 | 8 | -0.000000314 | -0.000009145 | -0.000005529 |

---

**10a—Conformer 2:**

SCF Done: E(RM062X) = -699.112486839

Sum of electronic and thermal Free Energies = -698.783479

---

|    |   |              |              |              |
|----|---|--------------|--------------|--------------|
| 1  | 6 | 0.000009311  | 0.000058716  | 0.000051544  |
| 2  | 6 | 0.000011735  | -0.000030883 | -0.000020583 |
| 3  | 6 | -0.000003221 | 0.000004068  | 0.000001070  |
| 4  | 6 | -0.000000671 | -0.000002017 | 0.000009395  |
| 5  | 1 | -0.000006450 | -0.000012816 | -0.000007440 |
| 6  | 6 | -0.000007392 | -0.000014284 | -0.000007506 |
| 7  | 6 | 0.000020076  | 0.000002995  | 0.000005776  |
| 8  | 6 | -0.000003368 | -0.000009200 | -0.000007589 |
| 9  | 6 | -0.000002342 | -0.000002422 | -0.000003297 |
| 10 | 6 | -0.000006461 | -0.000013079 | 0.000007156  |
| 11 | 6 | 0.000008931  | 0.000019385  | -0.000002094 |
| 12 | 1 | 0.000000161  | 0.000007045  | 0.000002188  |
| 13 | 1 | 0.000002776  | 0.000004323  | 0.000001723  |
| 14 | 1 | 0.000004093  | -0.000004050 | 0.000003409  |
| 15 | 1 | -0.000000124 | 0.000000906  | -0.000002974 |
| 16 | 1 | 0.000001523  | -0.000001360 | -0.000001472 |
| 17 | 1 | -0.000003889 | -0.000002425 | -0.000002975 |
| 18 | 1 | -0.000002669 | -0.000000629 | 0.000004656  |
| 19 | 1 | -0.000001339 | -0.000000635 | -0.000000935 |
| 20 | 6 | 0.000002129  | -0.000008778 | 0.000000750  |
| 21 | 1 | -0.000002896 | -0.000001735 | 0.000002522  |
| 22 | 1 | 0.000000097  | 0.000003028  | 0.000000196  |
| 23 | 1 | -0.000000523 | 0.000002560  | 0.000002595  |
| 24 | 6 | 0.000000431  | -0.000002892 | -0.000003212 |
| 25 | 1 | 0.000000130  | -0.000000341 | -0.000000502 |
| 26 | 1 | 0.000000166  | -0.000001841 | 0.000001019  |
| 27 | 1 | 0.000000644  | -0.000001122 | -0.000000873 |
| 28 | 6 | 0.000000870  | 0.000007567  | -0.000007298 |
| 29 | 1 | 0.000000933  | 0.000003070  | -0.000001011 |
| 30 | 1 | -0.000002507 | -0.000001290 | 0.000001595  |
| 31 | 1 | 0.000000083  | -0.000000179 | 0.000000222  |
| 32 | 1 | -0.000002920 | 0.000006336  | -0.000002390 |
| 33 | 6 | -0.000039940 | 0.000013184  | 0.000028620  |
| 34 | 1 | 0.000005634  | -0.000000651 | -0.000002234 |
| 35 | 1 | 0.000011949  | 0.000001036  | -0.000006363 |
| 36 | 6 | 0.000001063  | -0.000003755 | -0.000017920 |
| 37 | 1 | 0.000003159  | 0.000002778  | -0.000002619 |
| 38 | 1 | 0.000002285  | -0.000001191 | 0.000000717  |
| 39 | 1 | 0.000001515  | 0.000000913  | 0.000004093  |
| 40 | 6 | -0.000004234 | -0.000015333 | -0.000019852 |
| 41 | 8 | 0.000001251  | -0.000005002 | -0.000008106 |

---

**10b—Conformer 1:**

SCF Done: E(RM062X) = -699.121415688

Sum of electronic and thermal Free Energies = -698.792447

---

|    |   |              |              |              |
|----|---|--------------|--------------|--------------|
| 1  | 6 | -0.000001824 | -0.000009873 | 0.000013411  |
| 2  | 6 | 0.000000618  | 0.000001871  | -0.000016391 |
| 3  | 6 | 0.000008460  | 0.000009547  | 0.000001087  |
| 4  | 6 | -0.000002751 | -0.000000423 | 0.000004315  |
| 5  | 1 | -0.000002873 | -0.000005037 | -0.000001577 |
| 6  | 1 | -0.000001455 | -0.000008011 | -0.000004395 |
| 7  | 1 | -0.000003063 | -0.000000094 | 0.000002947  |
| 8  | 1 | -0.000004243 | -0.000002561 | 0.000001864  |
| 9  | 1 | 0.000001979  | 0.000005820  | -0.000003531 |
| 10 | 1 | -0.000000612 | 0.000003428  | 0.000002072  |
| 11 | 1 | -0.000001093 | 0.000002576  | -0.000002262 |
| 12 | 6 | -0.000011801 | 0.000012717  | -0.000030053 |
| 13 | 6 | -0.000000953 | -0.000039917 | 0.000064899  |
| 14 | 6 | -0.000018248 | -0.000027621 | -0.000025103 |
| 15 | 6 | -0.000017962 | -0.000009215 | -0.000007317 |
| 16 | 6 | 0.000012348  | 0.000007009  | 0.000019517  |
| 17 | 6 | 0.000000929  | 0.000018068  | 0.000000655  |
| 18 | 1 | 0.000001811  | -0.000001227 | 0.000000848  |
| 19 | 1 | 0.000003177  | 0.000001526  | -0.000012700 |
| 20 | 6 | 0.000020559  | 0.000010676  | -0.000001011 |
| 21 | 1 | -0.000000938 | -0.000002983 | -0.000001480 |
| 22 | 1 | 0.000003053  | 0.000001095  | -0.000004486 |
| 23 | 1 | -0.000003008 | -0.000006744 | -0.000000764 |
| 24 | 6 | 0.000001726  | 0.000004599  | 0.000001837  |
| 25 | 1 | 0.000001049  | 0.000003571  | -0.000001374 |
| 26 | 1 | -0.000000135 | 0.000003679  | 0.000003434  |
| 27 | 1 | -0.000000667 | 0.000003016  | -0.000000738 |
| 28 | 6 | 0.000003242  | 0.000004819  | 0.000010374  |
| 29 | 1 | 0.000006587  | 0.000001318  | -0.000004363 |
| 30 | 1 | 0.000000417  | 0.000002564  | -0.000003646 |
| 31 | 1 | 0.000003918  | 0.000005063  | -0.000003105 |
| 32 | 1 | -0.000000875 | 0.000004703  | -0.000004917 |
| 33 | 6 | -0.000019759 | 0.000040864  | -0.000013430 |
| 34 | 1 | -0.000004006 | -0.000009739 | 0.000010056  |
| 35 | 1 | -0.000010082 | -0.000017093 | 0.000001646  |
| 36 | 6 | 0.000033187  | -0.000000768 | 0.000003926  |
| 37 | 1 | 0.000000994  | -0.000002003 | -0.000006042 |
| 38 | 1 | -0.000001051 | -0.000004410 | 0.000001968  |
| 39 | 1 | 0.000004251  | 0.000003110  | -0.000000606 |
| 40 | 6 | 0.000010751  | -0.000008575 | -0.000007742 |
| 41 | 8 | -0.000011655 | 0.000004653  | 0.000012175  |

---

### D. Table of computed isotropic chemical shifts.

**Table S5.** Isotropic chemical shifts ( $\sigma_{\text{DFT}}$ ) for the conformers of structures **10a** and **10b** that were computed at the two different levels of theory employed in this study.

| LEVEL OF THEORY  | WP04 / pcS-2 // M06-2X / 6-31+G(d,p)           |              |              |                                                  |              |              | B3LYP / 6-31G(d,p) // MMFFs            |              |              |
|------------------|------------------------------------------------|--------------|--------------|--------------------------------------------------|--------------|--------------|----------------------------------------|--------------|--------------|
|                  | $\sigma_{\text{DFT}}^a$<br>[IEFPCM = methanol] |              |              | $\sigma_{\text{DFT}}^b$<br>[IEFPCM = chloroform] |              |              | $\sigma_{\text{DFT}}^c$<br>[gas phase] |              |              |
|                  | <i>10a-1</i>                                   | <i>10a-2</i> | <i>10b-1</i> | <i>10a-1</i>                                     | <i>10a-2</i> | <i>10b-1</i> | <i>10a-1</i>                           | <i>10a-2</i> | <i>10b-1</i> |
| ATOM #           |                                                |              |              |                                                  |              |              |                                        |              |              |
| 13               | 29.09                                          | 29.17        | 29.07        | 29.18                                            | 29.26        | 29.16        | 29.36                                  | 29.41        | 29.34        |
| 15               | 26.27                                          | 26.35        | 26.35        | 26.30                                            | 26.39        | 26.38        | 26.07                                  | 26.18        | 26.15        |
| 17 <sub>eq</sub> | 30.32                                          | 30.74        | 30.37        | 30.36                                            | 30.77        | 30.40        | 30.42                                  | 30.75        | 30.34        |
| 17 <sub>ax</sub> | 30.36                                          | 30.22        | 30.85        | 30.37                                            | 30.22        | 30.87        | 30.11                                  | 30.01        | 30.75        |
| 18               | 29.97                                          | 30.15        | 30.12        | 29.99                                            | 30.19        | 30.15        | 29.86                                  | 29.98        | 29.99        |
| 19 <sub>eq</sub> | 30.39                                          | 30.46        | 30.19        | 30.37                                            | 30.50        | 30.18        | 30.21                                  | 30.35        | 30.01        |
| 19 <sub>ax</sub> | 30.42                                          | 30.38        | 30.96        | 30.46                                            | 30.37        | 31.00        | 30.29                                  | 30.20        | 30.91        |
| 20 <sub>eq</sub> | 30.33                                          | 30.22        | 30.22        | 30.23                                            | 30.17        | 30.12        | 29.87                                  | 29.65        | 29.72        |
| 20 <sub>ax</sub> | 30.32                                          | 30.33        | 30.45        | 30.35                                            | 30.30        | 30.47        | 30.27                                  | 30.15        | 30.39        |
| 21               | 30.25                                          | 29.87        | 30.28        | 30.34                                            | 29.97        | 30.38        | 30.25                                  | 29.86        | 30.30        |
| 22               | 29.43                                          | 29.43        | 29.43        | 29.48                                            | 29.48        | 29.48        | 29.59                                  | 29.58        | 29.61        |
| 25               | 30.04                                          | 30.02        | 30.02        | 30.06                                            | 30.04        | 30.04        | 30.14                                  | 30.14        | 30.12        |
| 26               | 30.78                                          | 30.85        | 30.87        | 30.78                                            | 30.86        | 30.88        | 30.65                                  | 30.79        | 30.76        |
| 27               | 30.70                                          | 30.97        | 30.96        | 30.71                                            | 30.97        | 30.96        | 30.66                                  | 30.94        | 30.96        |

<sup>a</sup> Values for  $\sigma_{\text{DFT}}$  were referenced to the isotropic chemical shift for the protons of tetramethylsilane to obtain the Boltzmann-weighted values of  $\delta_{\text{DFT}}$  (methanol) listed in Table 1 (manuscript). <sup>b</sup> Values for  $\sigma_{\text{DFT}}$  were referenced to the isotropic chemical shift for the protons of tetramethylsilane ( $\sigma_{\text{REF}} = 31.78$ ) to obtain the Boltzmann-weighted values of  $\delta_{\text{DFT}}$  (chloroform) provided in Table S6. <sup>c</sup> Values for  $\sigma_{\text{DFT}}$  were referenced to the isotropic chemical shift for the protons of tetramethylsilane ( $\sigma_{\text{REF}} = 31.83$ ) and then empirically scaled to obtain the values of  $\delta_{\text{DFT}}$  that were used in the DP4 analysis.

**E.** Description of data input into the Goodman DP4 applet.<sup>14</sup>----- **COMPUTED DATA** [B3LYP / 6-31G(d,p) // MMFF]

Empirically scaled proton chemical shifts:

H-15, H-17eq, H-17ax, H-18, H-19eq, H-19ax, H-20ax, H-20eq, H-21, H-22, H-13, Me-25, Me-26, and Me-27.

5.99, 0.98, 1.41, 1.66, 1.26, 1.21, 1.24, 1.71, 1.31, 2.00, 2.25, 1.36, 0.76, and 0.72. (**10a**; isomer #1)

5.68, 1.30, 0.88, 1.67, 1.64, 0.70, 1.25, 1.95, 1.34, 2.07, 2.34, 1.53, 0.86, and 0.66. (**10b**; isomer #2)

----- **EXPERIMENTAL DATA**

**7** (CDCl<sub>3</sub>): 5.39 (H-15), 1.45 (H-17eq or H-17ax), 0.72 (H-17eq or H-17ax), 1.63 (H-18), 1.72 (H-19eq or H-19ax), 0.60 (H-19eq or H-19ax), 1.21 (H-20ax or H-20eq), 1.64 (H-20ax or H-20eq), 1.40 (H-21), 2.44 (H-22), 2.98 (H-13), 1.88 (Me-25), 0.82 (Me-26), and 0.82 (Me-27).

**1'** (CD<sub>3</sub>OD): 5.36 (H-15), 1.45 (H-17eq or H-17ax), 0.67 (H-17eq or H-17ax), 1.62 (H-18), 1.64 (H-19eq or H-19ax), 0.56 (H-19eq or H-19ax), 1.10 (H-20ax or H-20eq), 1.50 (H-20ax or H-20eq), 1.42 (H-21), 2.24 (H-22), 2.85 (H-13), 1.88 (Me-25), 0.80 (Me-26 or Me-27), and 0.78 (Me-26 or Me-27).

F. Table S6 of chloroform data (analogous to Table 1 in the manuscript).

**Table S6.** Comparison of the computed (with chloroform solvation) proton NMR chemical shifts ( $\delta_{\text{DFT}}$ ) for structures **10a** and **10b** with the experimentally observed shifts ( $\delta_{\text{EXP}}$ ) for the analogous subset of nuclei in the spectrum of diaporthichalasin (**7**) in  $\text{CDCl}_3$ .

| ATOM<br>#                               | $\delta_{\text{DFT}}^a$ (chloroform) |            | $\delta_{\text{EXP}}$<br><b>7</b> | $ \Delta\delta $ for $\delta_{\text{DFT}}^a$ vs. $\delta_{\text{EXP}}$ |                  |
|-----------------------------------------|--------------------------------------|------------|-----------------------------------|------------------------------------------------------------------------|------------------|
|                                         | <b>10a</b>                           | <b>10b</b> |                                   | <b>10a vs. 7</b>                                                       | <b>10b vs. 7</b> |
| 13                                      | 2.59                                 | 2.62       | 2.98                              | 0.39                                                                   | 0.36             |
| 15                                      | 5.47                                 | 5.40       | 5.39                              | 0.08                                                                   | 0.01             |
| 17 <sub>eq</sub>                        | 1.39                                 | 1.38       | 1.45                              | 0.06                                                                   | 0.07             |
| 17 <sub>ax</sub>                        | 1.42                                 | 0.91       | 0.72                              | 0.70                                                                   | 0.19             |
| 18                                      | 1.77                                 | 1.63       | 1.63                              | 0.14                                                                   | 0.00             |
| 19 <sub>eq</sub>                        | 1.39                                 | 1.60       | 1.72                              | 0.33                                                                   | 0.12             |
| 19 <sub>ax</sub>                        | 1.33                                 | 0.78       | 0.60                              | 0.73                                                                   | 0.18             |
| 20 <sub>eq</sub>                        | 1.56                                 | 1.66       | 1.64                              | 0.08                                                                   | 0.02             |
| 20 <sub>ax</sub>                        | 1.43                                 | 1.31       | 1.21                              | 0.22                                                                   | 0.10             |
| 21                                      | 1.46                                 | 1.40       | 1.40                              | 0.06                                                                   | 0.00             |
| 22                                      | 2.30                                 | 2.30       | 2.44                              | 0.14                                                                   | 0.14             |
| 25                                      | 1.72                                 | 1.74       | 1.88                              | 0.16                                                                   | 0.14             |
| 26                                      | 0.99                                 | 0.90       | 0.82                              | 0.17                                                                   | 0.08             |
| 27                                      | 1.05                                 | 0.82       | 0.82                              | 0.23                                                                   | 0.00             |
| <b>MAE<sub>full</sub><sup>b</sup> =</b> |                                      |            |                                   | <b>0.25</b>                                                            | <b>0.10</b>      |
| <b>MAE<sub>lite</sub><sup>c</sup> =</b> |                                      |            |                                   | <b>0.34</b>                                                            | <b>0.09</b>      |
| <b>DP4 probability<sup>d</sup></b>      |                                      |            |                                   | <b>&lt;0.5%</b>                                                        | <b>&gt;99.5%</b> |

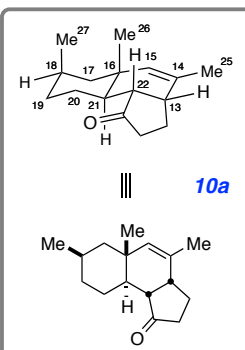

**10a**

"Phomopsichalasin-like"



**10b**

"Diaporthichalasin-like"

<sup>a</sup> Values for  $\delta_{\text{DFT}}$  were determined by referencing the computed isotropic chemical shifts ( $\sigma_{\text{DFT}}$ ) for all nuclei to the isotropic chemical shift for the protons of tetramethylsilane ( $\sigma_{\text{REF}}$ ), both of which were computed at the IEFPCM-WP04/pcS-2//M06-2X/6-31+G(d,p) level of theory. <sup>b</sup> Mean absolute error ( $|\Delta\delta_{\text{AVE}}|$ ). Calculation includes all proton nuclei that are listed in the table. <sup>c</sup> Including only the subset of proton nuclei 17-19, 26 and 27. <sup>d</sup> Scaled  $\delta_{\text{DFT}}$  values derived from chemical shifts computed at the B3LYP/6-31G(d,p)//MMFF level of theory (i.e., the level used by Smith and Goodman<sup>15</sup>) were employed.



## VII. References and Notes for the Supporting Information

---

- <sup>1</sup> (a) T. R. Hoye, P. R. Hanson, J. R. Vyvyan, *J. Org. Chem.* **1994**, *59*, 4096-4103. (b) T. R. Hoye, H. Zhao, *J. Org. Chem.* **2002**, *67*, 4014-4016.
- <sup>2</sup> Horn W. S.; Simmonds, M. S. J.; Schwartz, R. E.; Blaney, W. M. *Tetrahedron* **1995**, *51*, 3969-3978.
- <sup>3</sup> Pornpakakul, S.; Roengsumran, S.; Deechangvipart, S.; Petsom, A.; Muangsin, N.; Ngamrojnavanich, N.; Sriubolmas, N.; Chaichit, N.; Ohta, T. *Tetrahedron Lett.* **2007**, *48*, 651-655.
- <sup>4</sup> MacroModel, version 9.7, Schrödinger, LCC, New York, NY, 2009.
- <sup>5</sup> Maestro, version 9.0, Schrödinger, LCC, New York, NY, 2009.
- <sup>6</sup> Chang, G.; Guida, W. C.; Still, W. C. *J. Am. Chem. Soc.* **1989**, *111*, 4379-4386.
- <sup>7</sup> Gaussian 09, Revision A.1, Frisch, M. J.; Trucks, G. W.; Schlegel, H. B.; Scuseria, G. E.; Robb, M. A.; Cheeseman, J. R.; Scalmani, G.; Barone, V.; Mennucci, B.; Petersson, G. A.; Nakatsuji, H.; Caricato, M.; Li, X.; Hratchian, H. P.; Izmaylov, A. F.; Bloino, J.; Zheng, G.; Sonnenberg, J. L.; Hada, M.; Ehara, M.; Toyota, K.; Fukuda, R.; Hasegawa, J.; Ishida, M.; Nakajima, T.; Honda, Y.; Kitao, O.; Nakai, H.; Vreven, T.; Montgomery, Jr., J. A.; Peralta, J. E.; Ogliaro, F.; Bearpark, M.; Heyd, J. J.; Brothers, E.; Kudin, K. N.; Staroverov, V. N.; Kobayashi, R.; Normand, J.; Raghavachari, K.; Rendell, A.; Burant, J. C.; Iyengar, S. S.; Tomasi, J.; Cossi, M.; Rega, N.; Millam, N. J.; Klene, M.; Knox, J. E.; Cross, J. B.; Bakken, V.; Adamo, C.; Jaramillo, J.; Gomperts, R.; Stratmann, R. E.; Yazyev, O.; Austin, A. J.; Cammi, R.; Pomelli, C.; Ochterski, J. W.; Martin, R. L.; Morokuma, K.; Zakrzewski, V. G.; Voth, G. A.; Salvador, P.; Dannenberg, J. J.; Dapprich, S.; Daniels, A. D.; Farkas, Ö.; Foresman, J. B.; Ortiz, J. V.; Cioslowski, J.; Fox, D. J. Gaussian, Inc., Wallingford CT, 2009.
- <sup>8</sup> (a) Zhao, Y.; Truhlar, D. G. *Theor. Chem. Acc.* **2008**, *120*, 215-241. (b) Zhao, Y.; Truhlar, D. G. *Acc. Chem. Res.* **2008**, *41*, 157-167.
- <sup>9</sup> (a) Miertus, S.; Scrocco, E.; Tomasi, J. *Chem. Phys.* **1981**, *55*, 117-129. (b) Cancès, E.; Mennucci, B.; Tomasi, J. *J. Chem. Phys.* **1997**, *107*, 3032-3041.
- <sup>10</sup> Barone, V.; Cossi, M.; Tomasi, J. *J. Chem. Phys.* **1997**, *107*, 3210-3220.
- <sup>11</sup> Wiitala, K. W.; Hoye, T. R.; Cramer, C. J. *J. Chem. Theory Comput.* **2006**, *2*, 1085-1092.
- <sup>12</sup> Jensen, F. *J. Chem. Theory Comput.* **2008**, *4*, 719-727.
- <sup>13</sup> Bondi, A. *J. Phys. Chem.* **1964**, *68*, 441-451.
- <sup>14</sup> <http://www-jmg.ch.cam.ac.uk/tools/nmr/DP4/>
- <sup>15</sup> Smith, S. G.; Goodman, J. M. *J. Am. Chem. Soc.* **2010**, *132*, 12946-12959.

**VIII.** Copies of  $^1\text{H}$  and  $^{13}\text{C}$  NMR spectra in  $\text{CDCl}_3$ ,  $d_4$ -MeOH, and  $d_6$ -DMSO

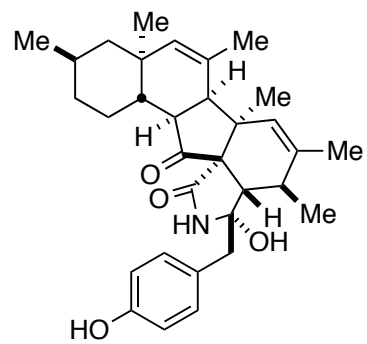

Diaporthichalasin (7)

CDCl<sub>3</sub> (850 MHz)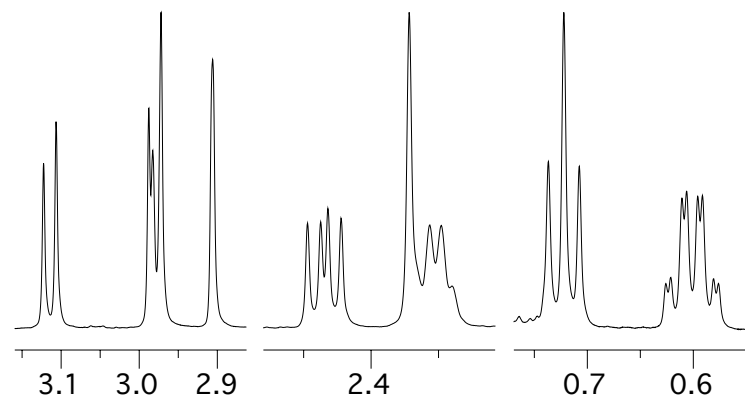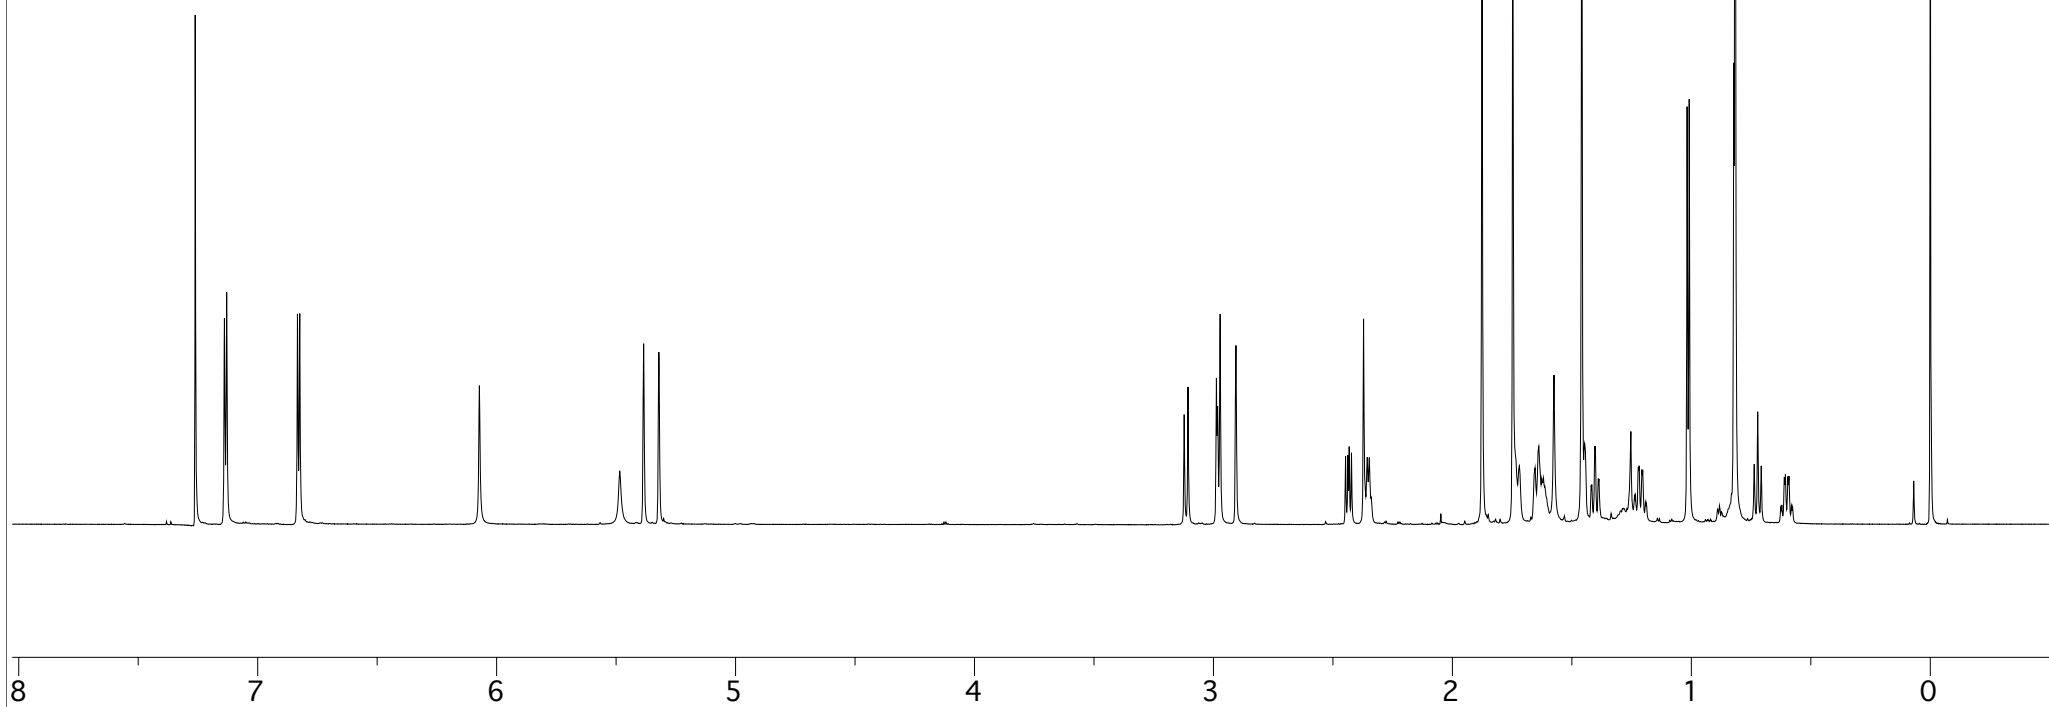

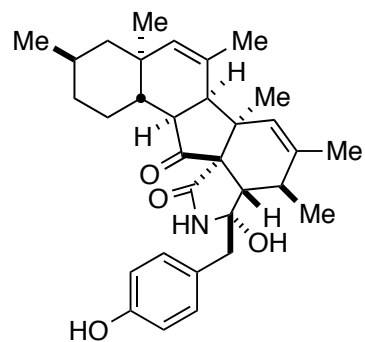

Diaporthichalasin (7)

CDCl<sub>3</sub> (500 MHz)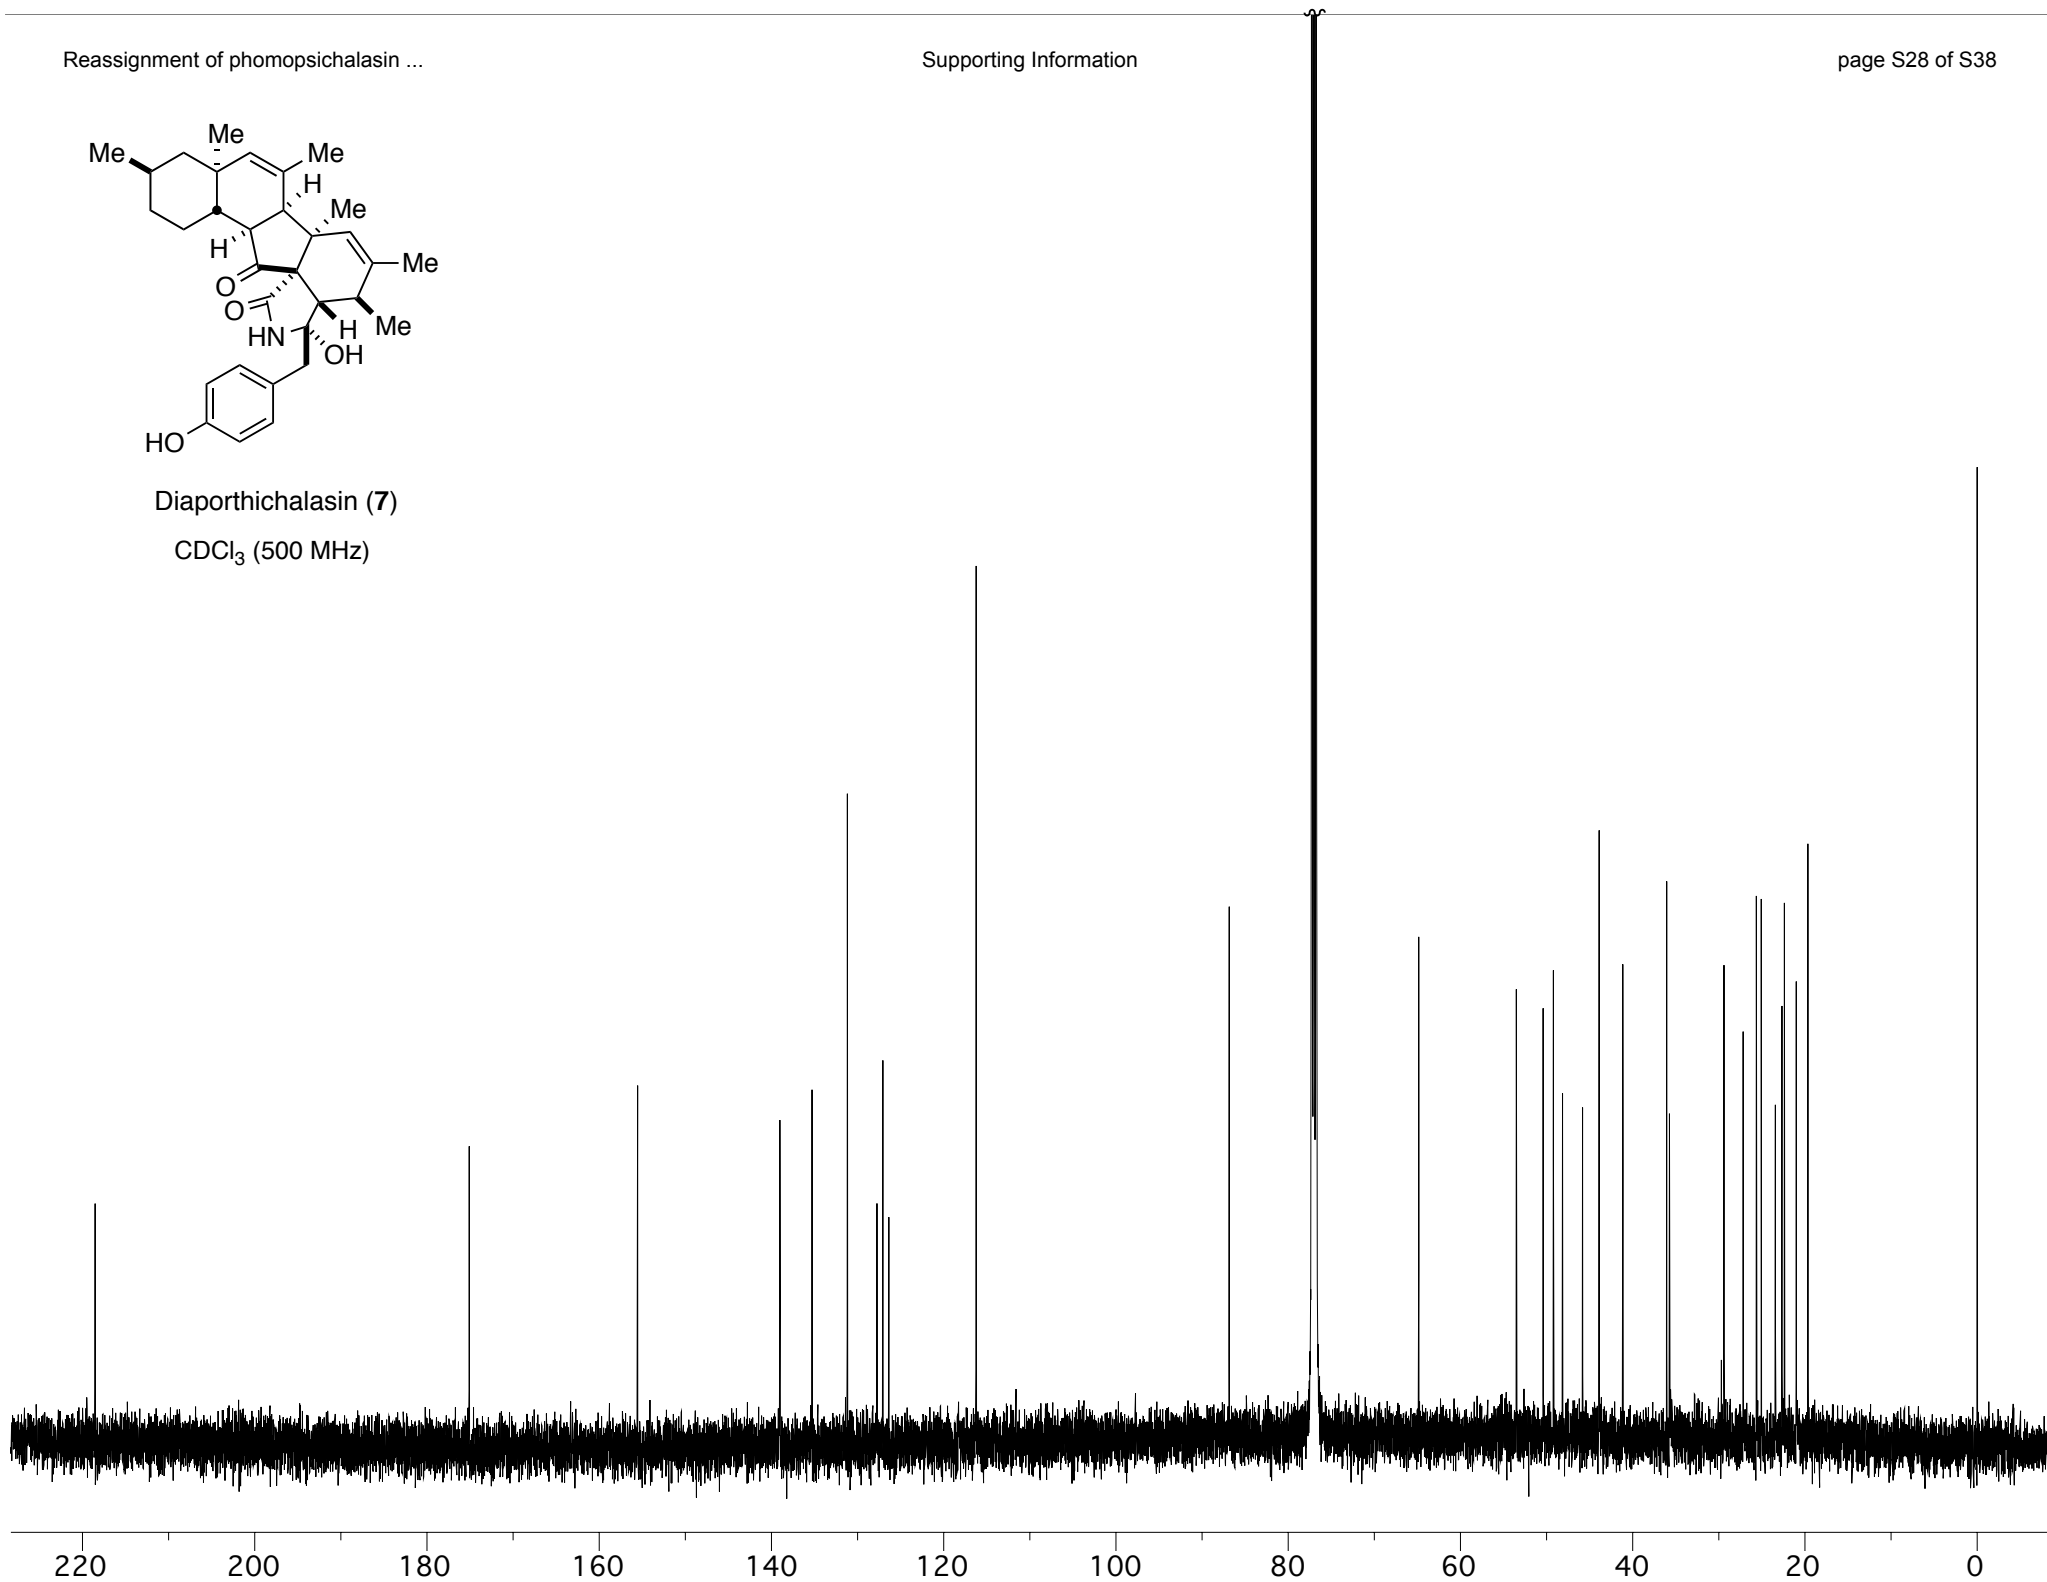

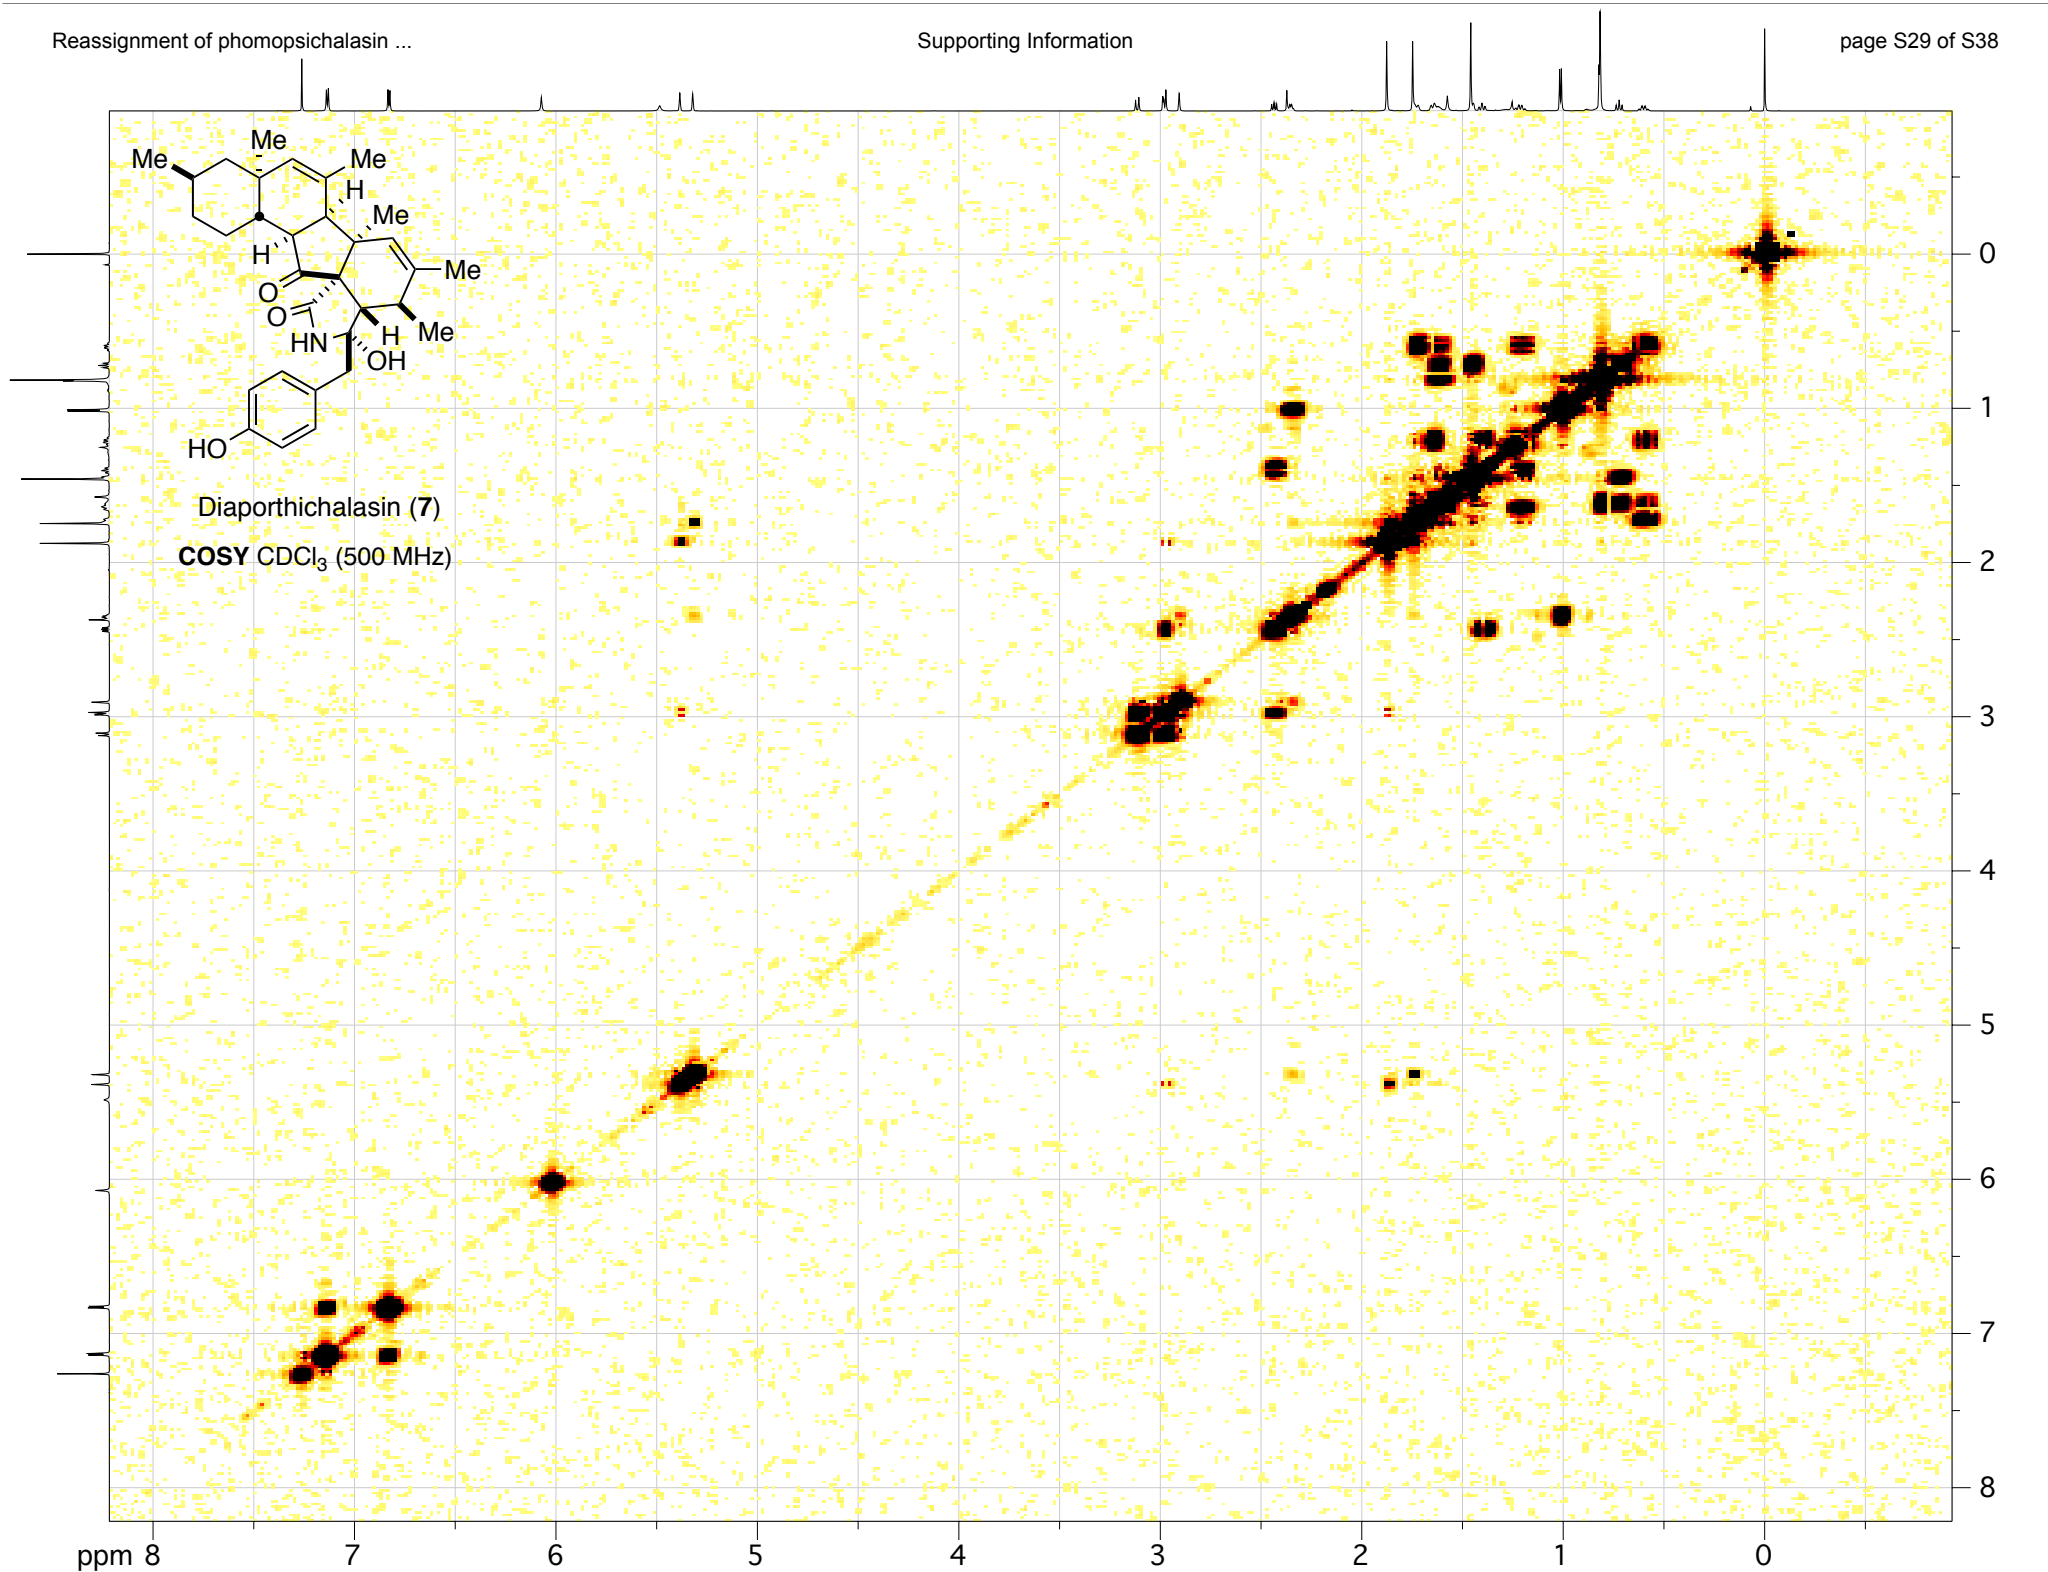

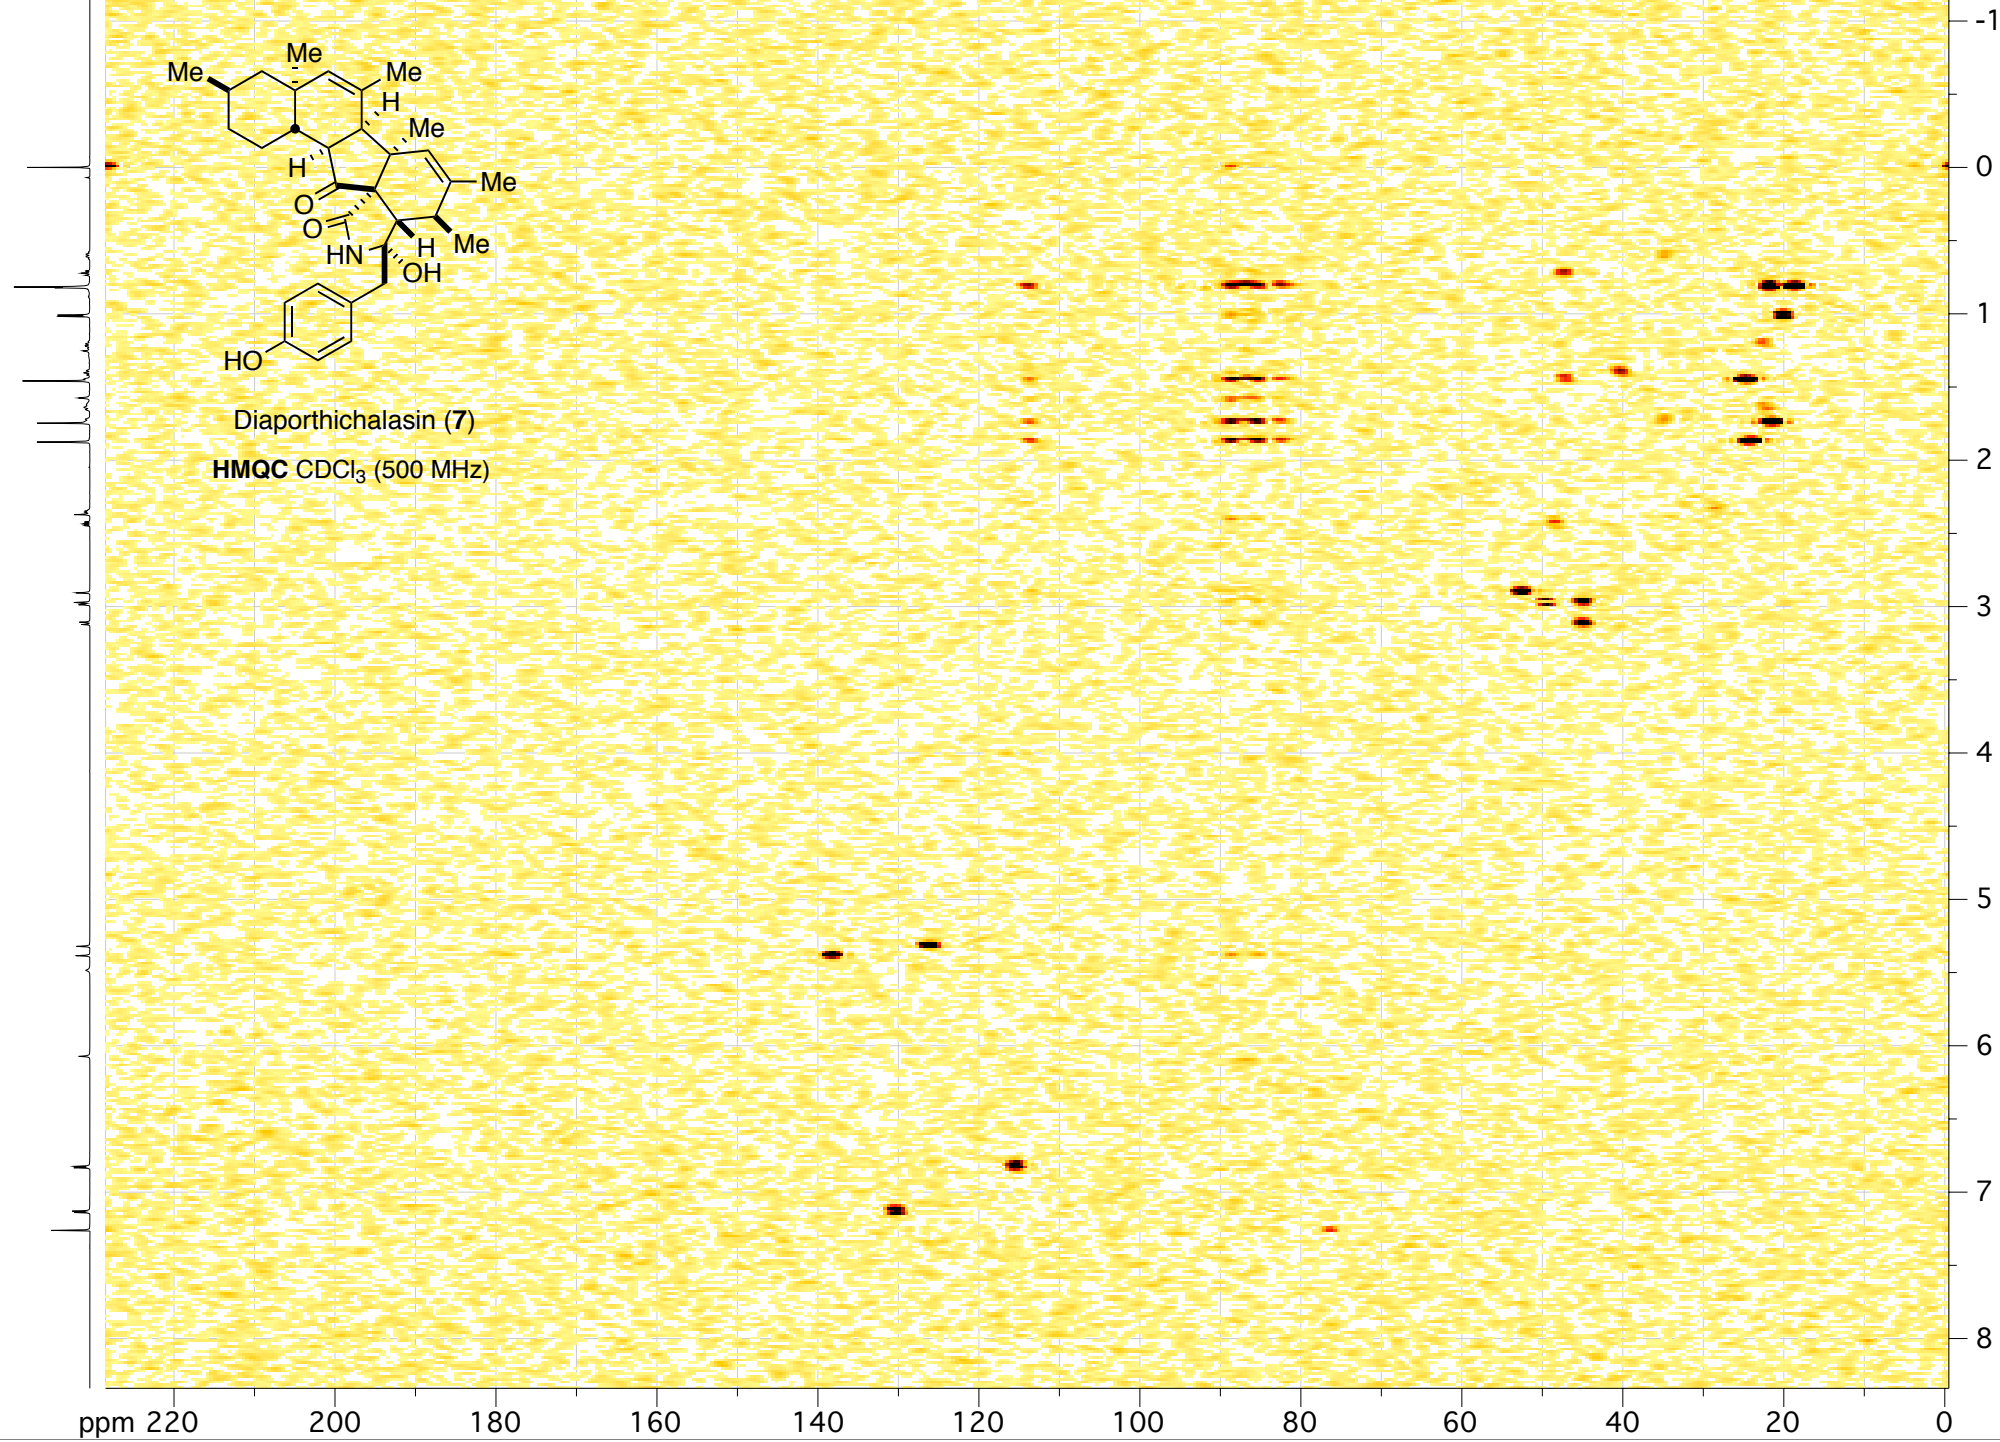

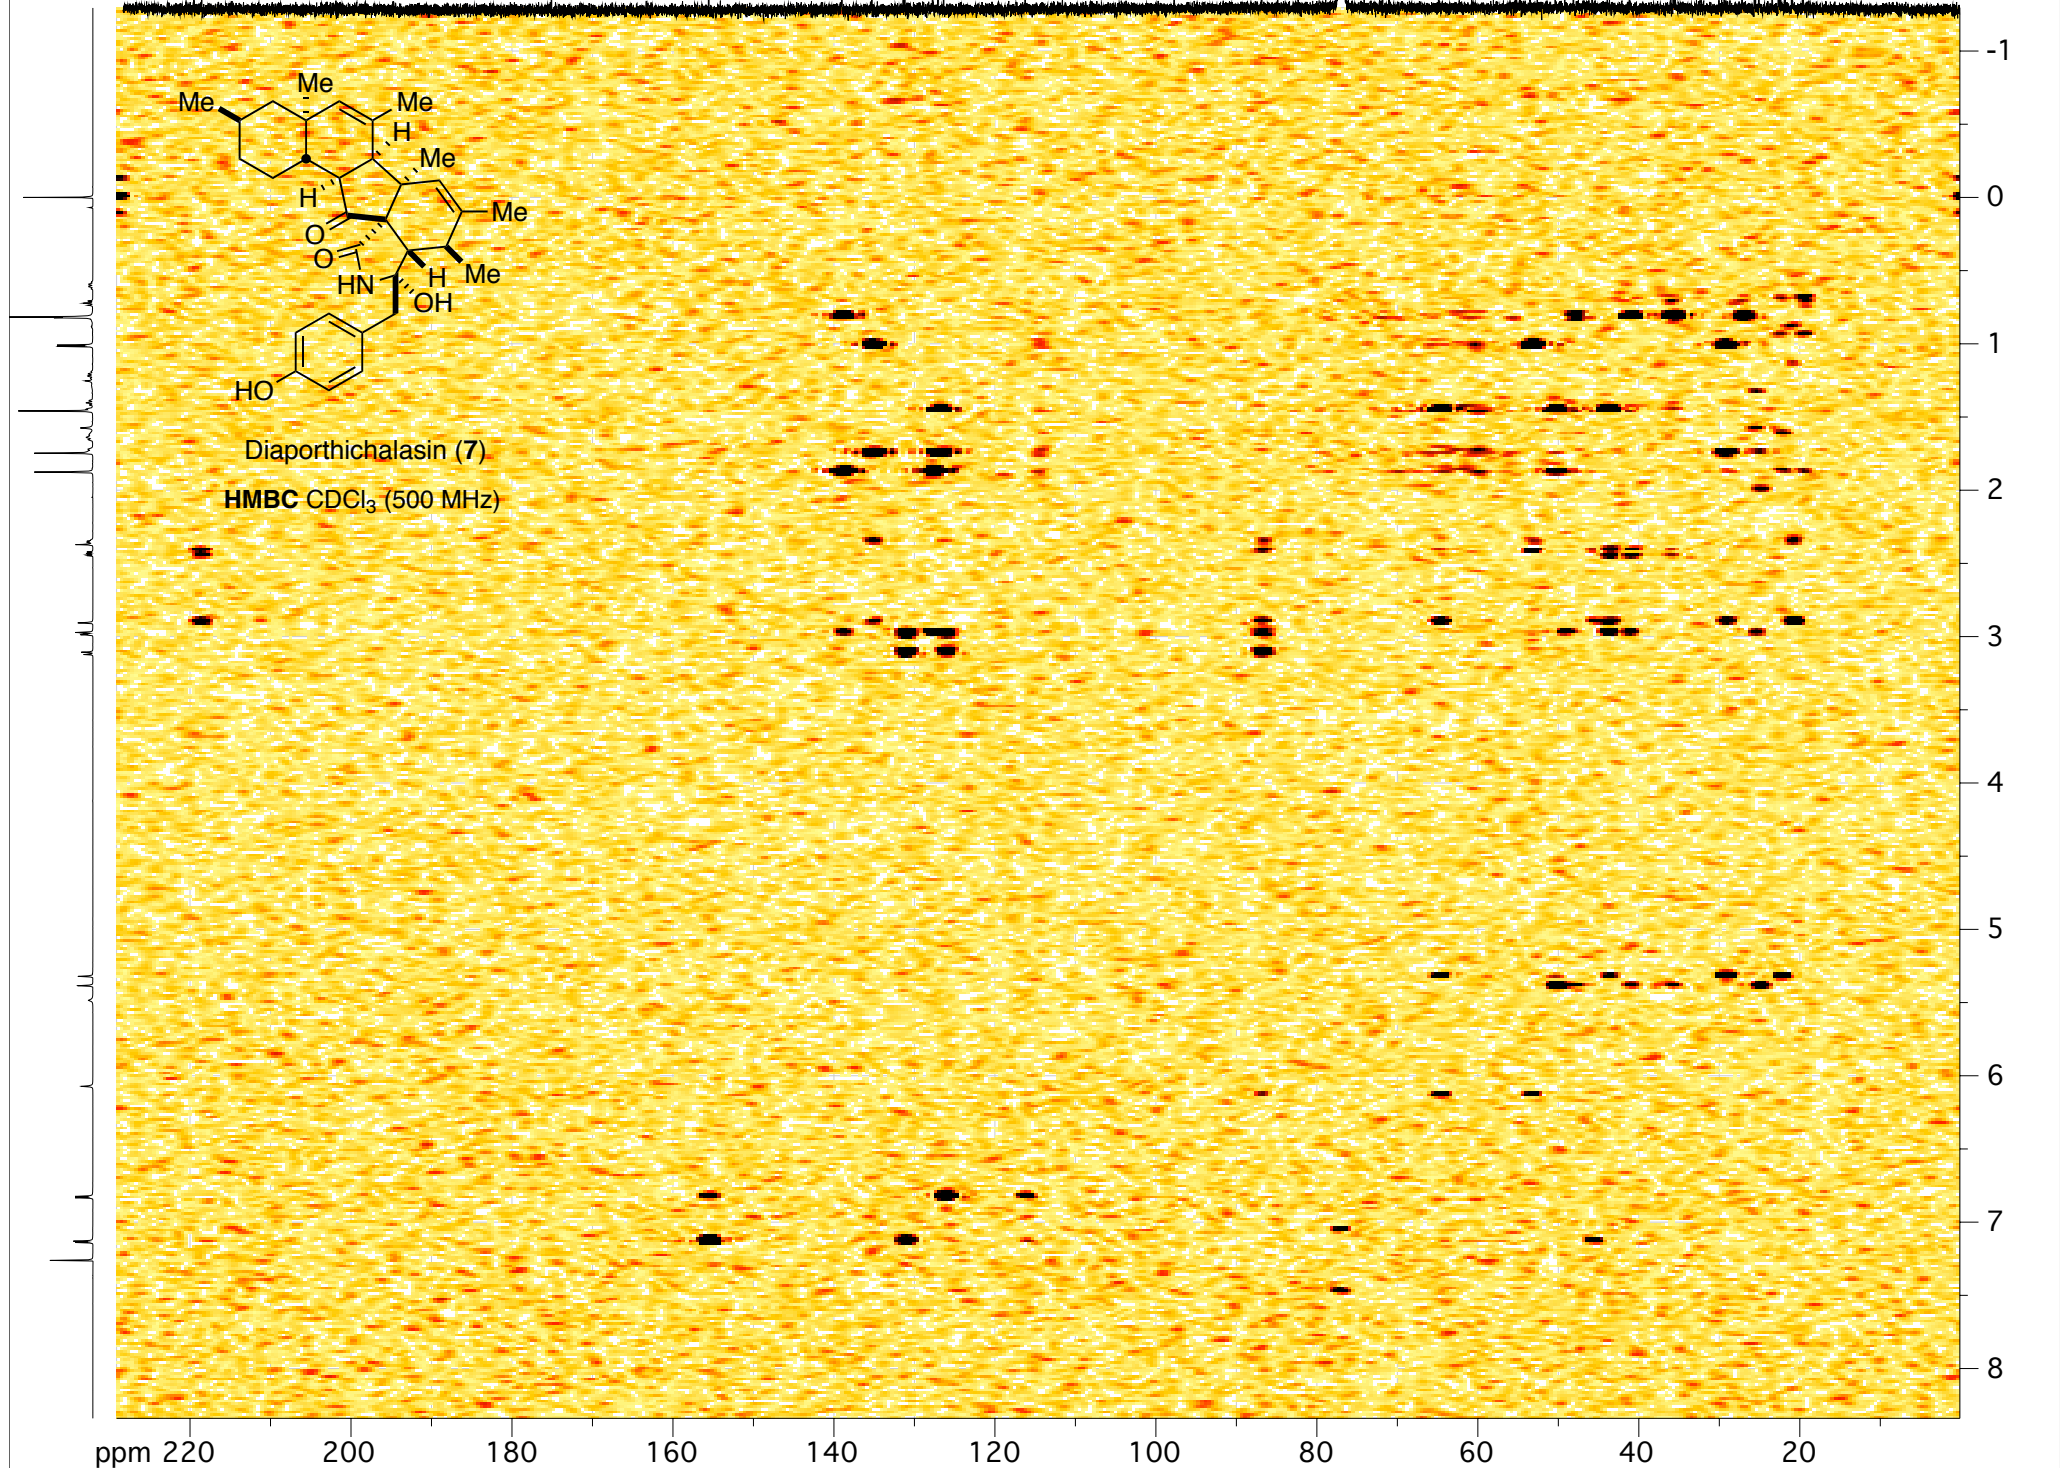

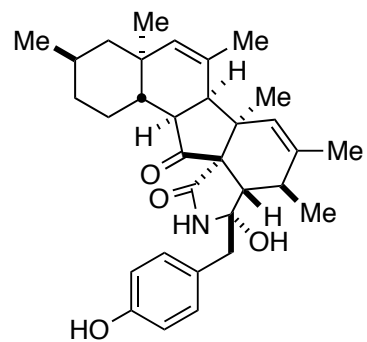

Diaporthichalasin (7)

 $d_4$ -methanol (850 MHz)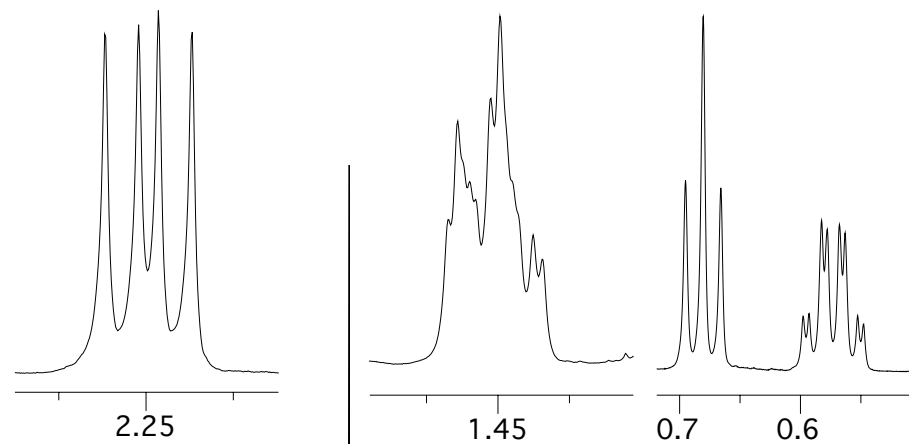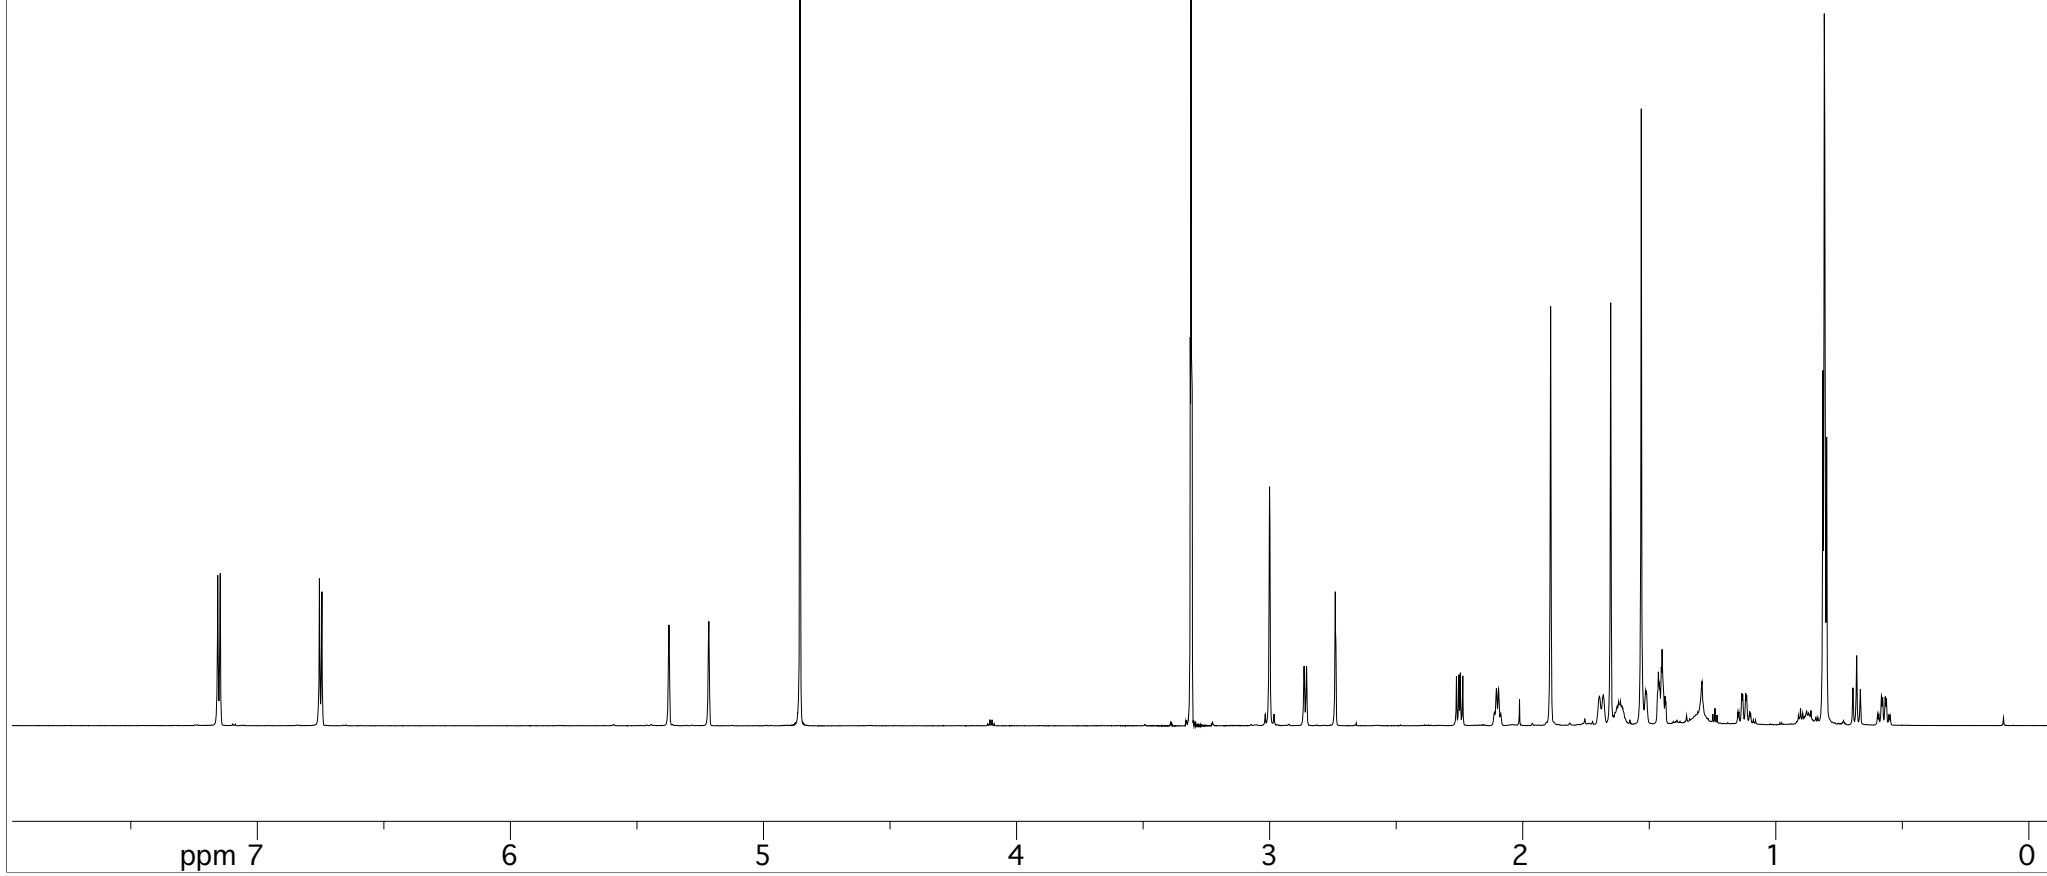



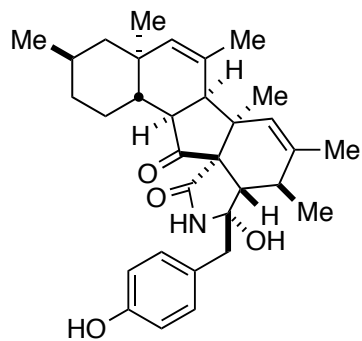

Diaporthichalasin (7)

 $d_4$ -methanol (500 MHz)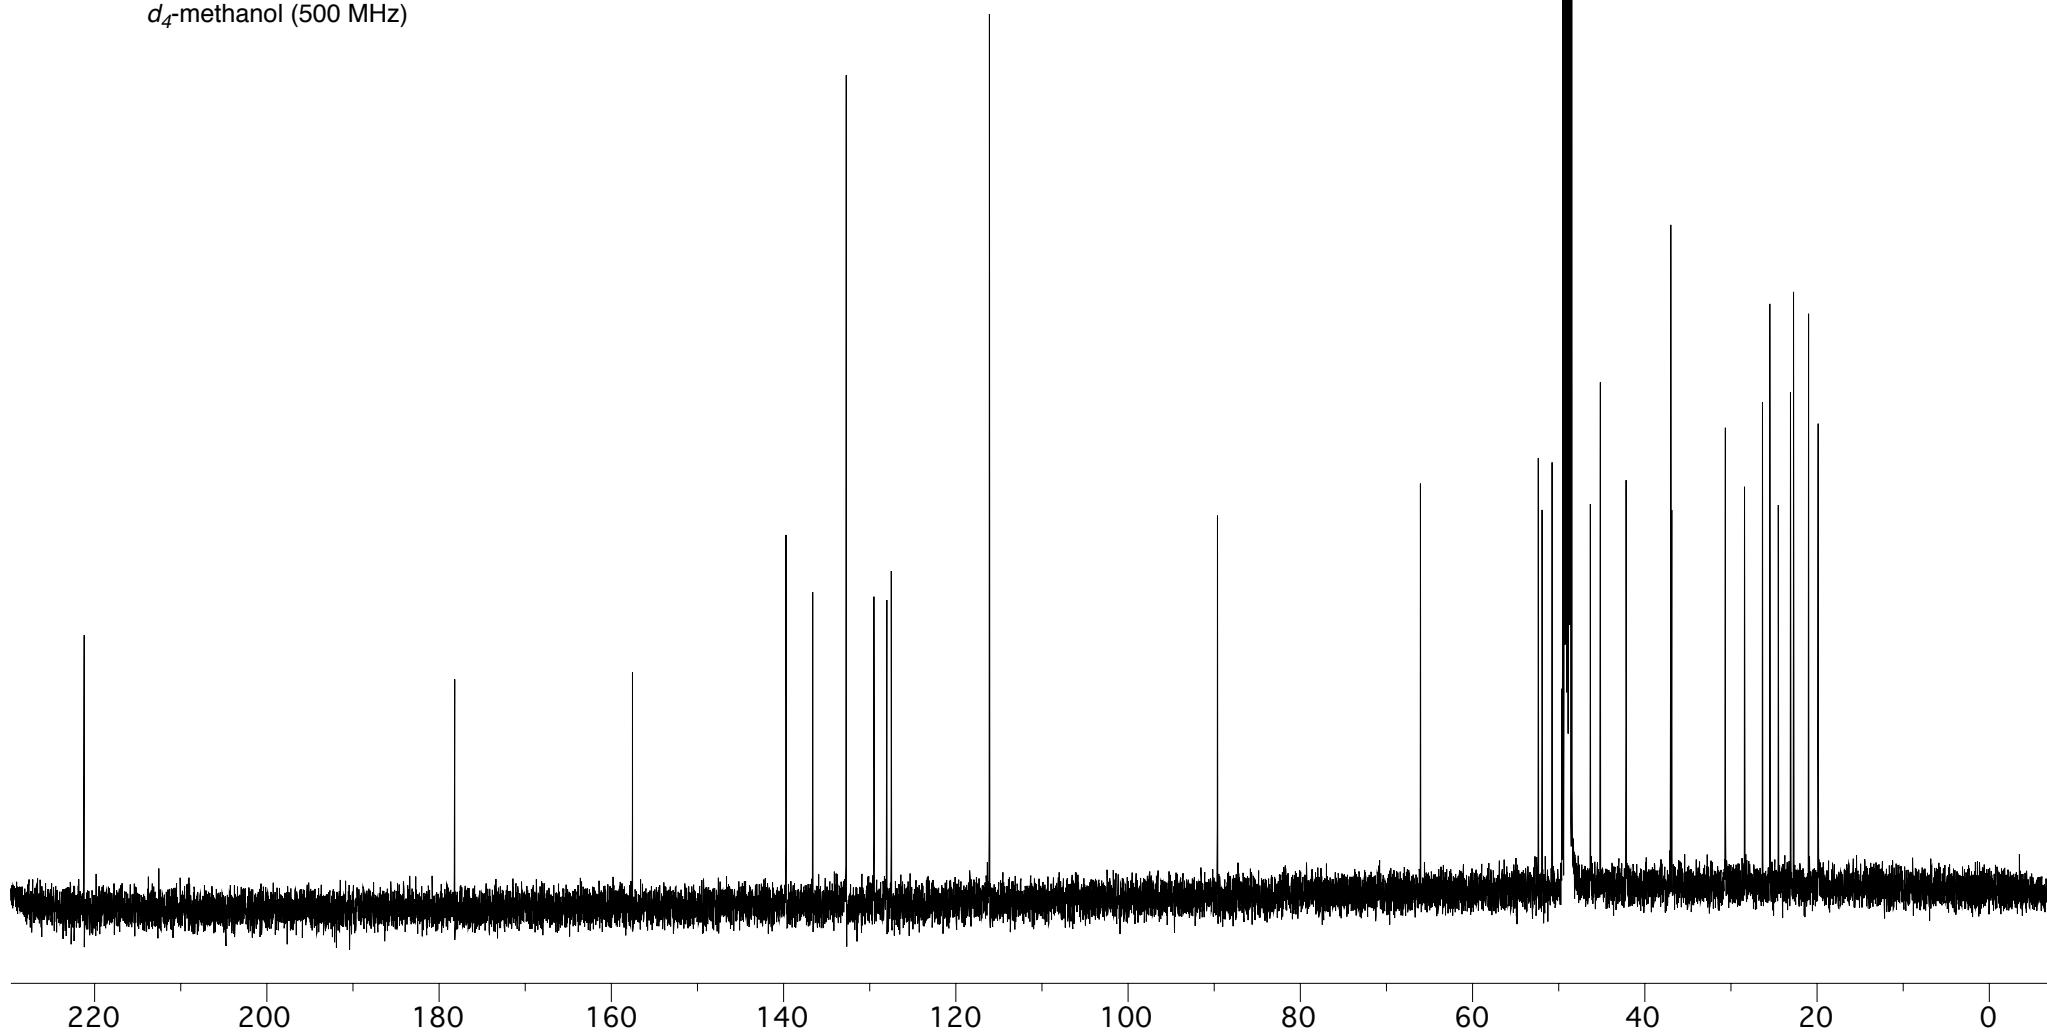

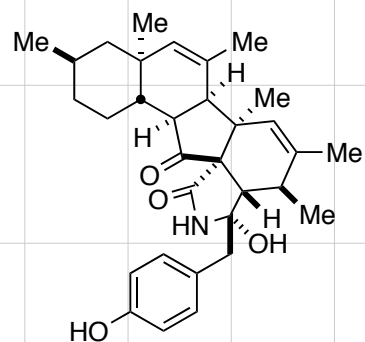

Diaporthichalasin (7)

COSY  $d_4$ -methanol (500 MHz)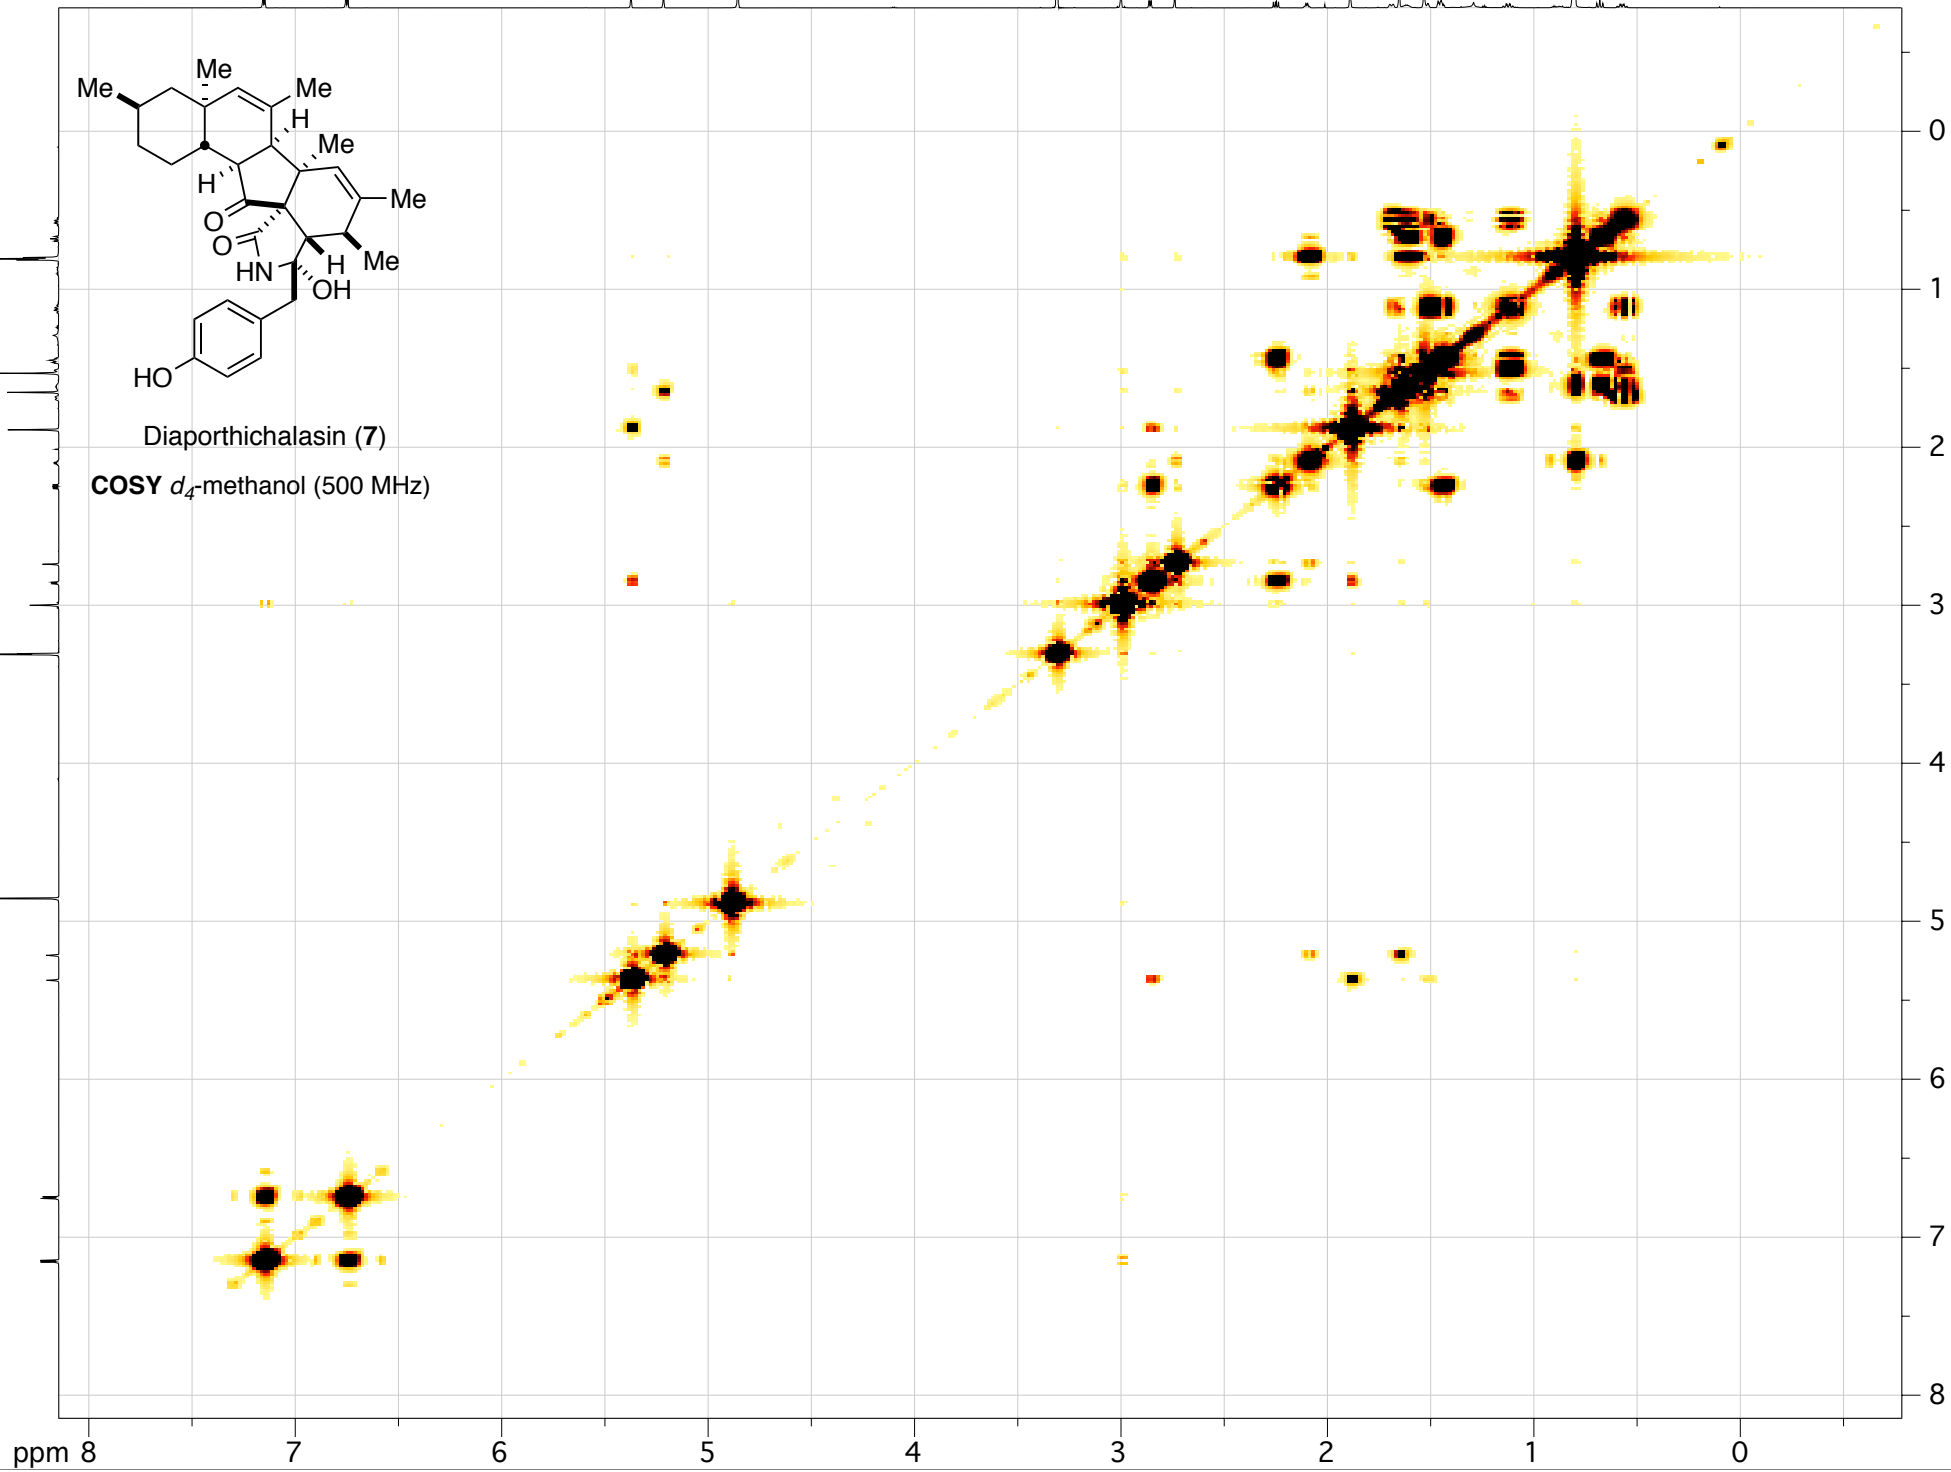

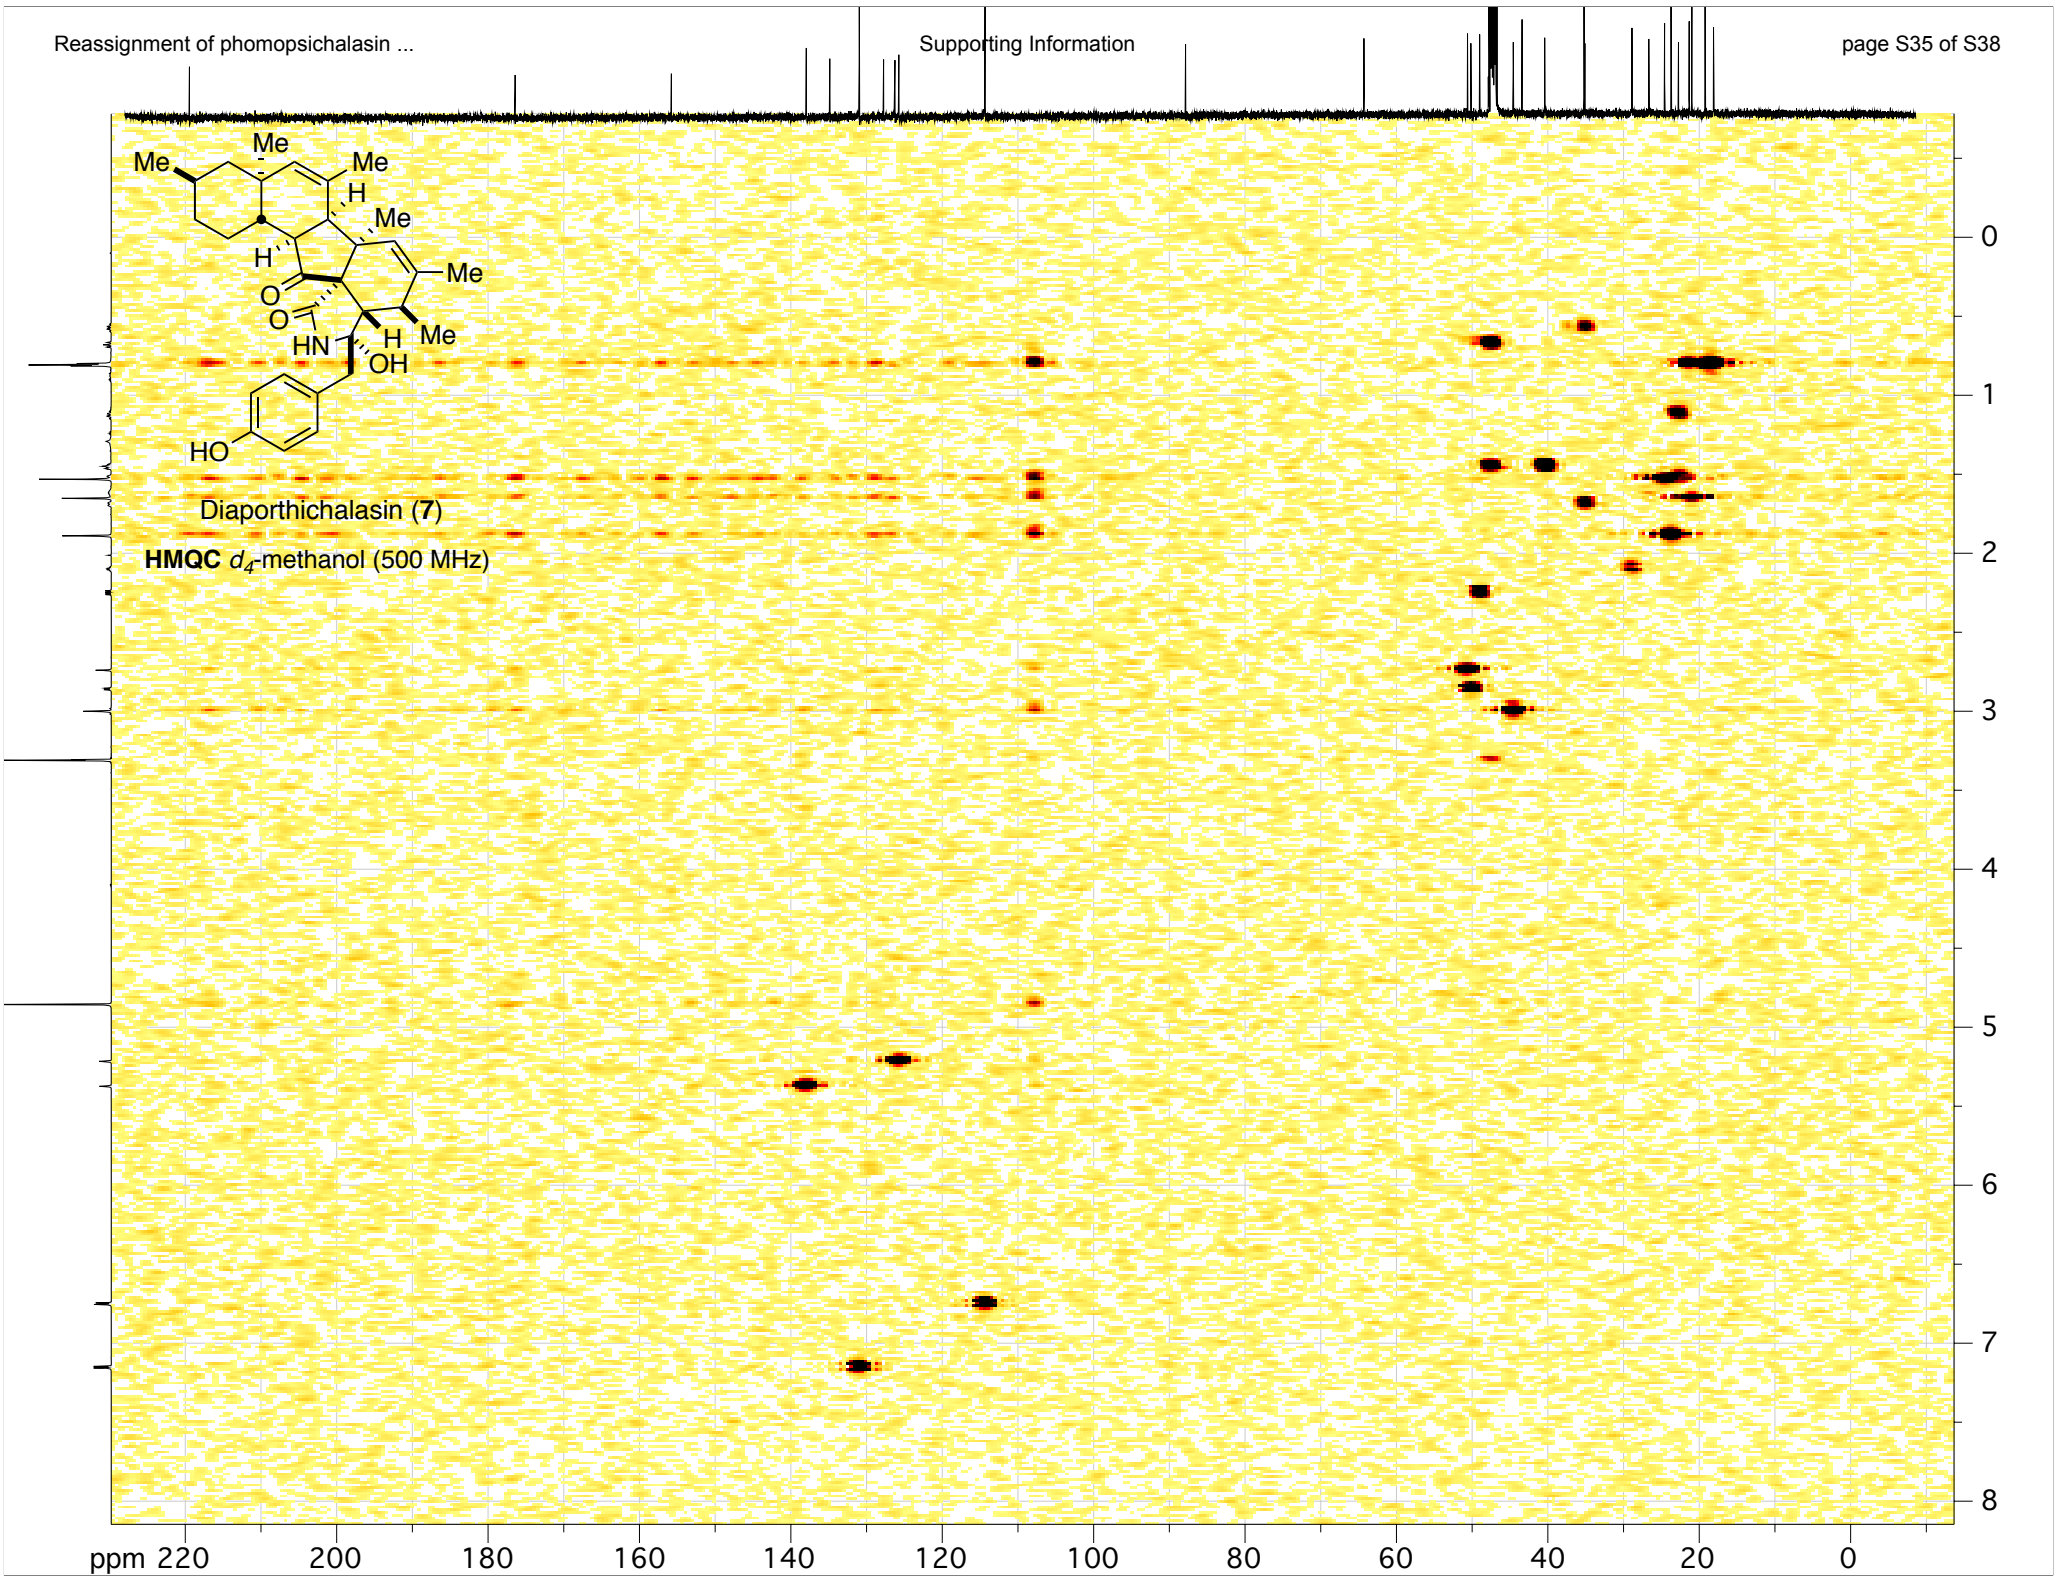

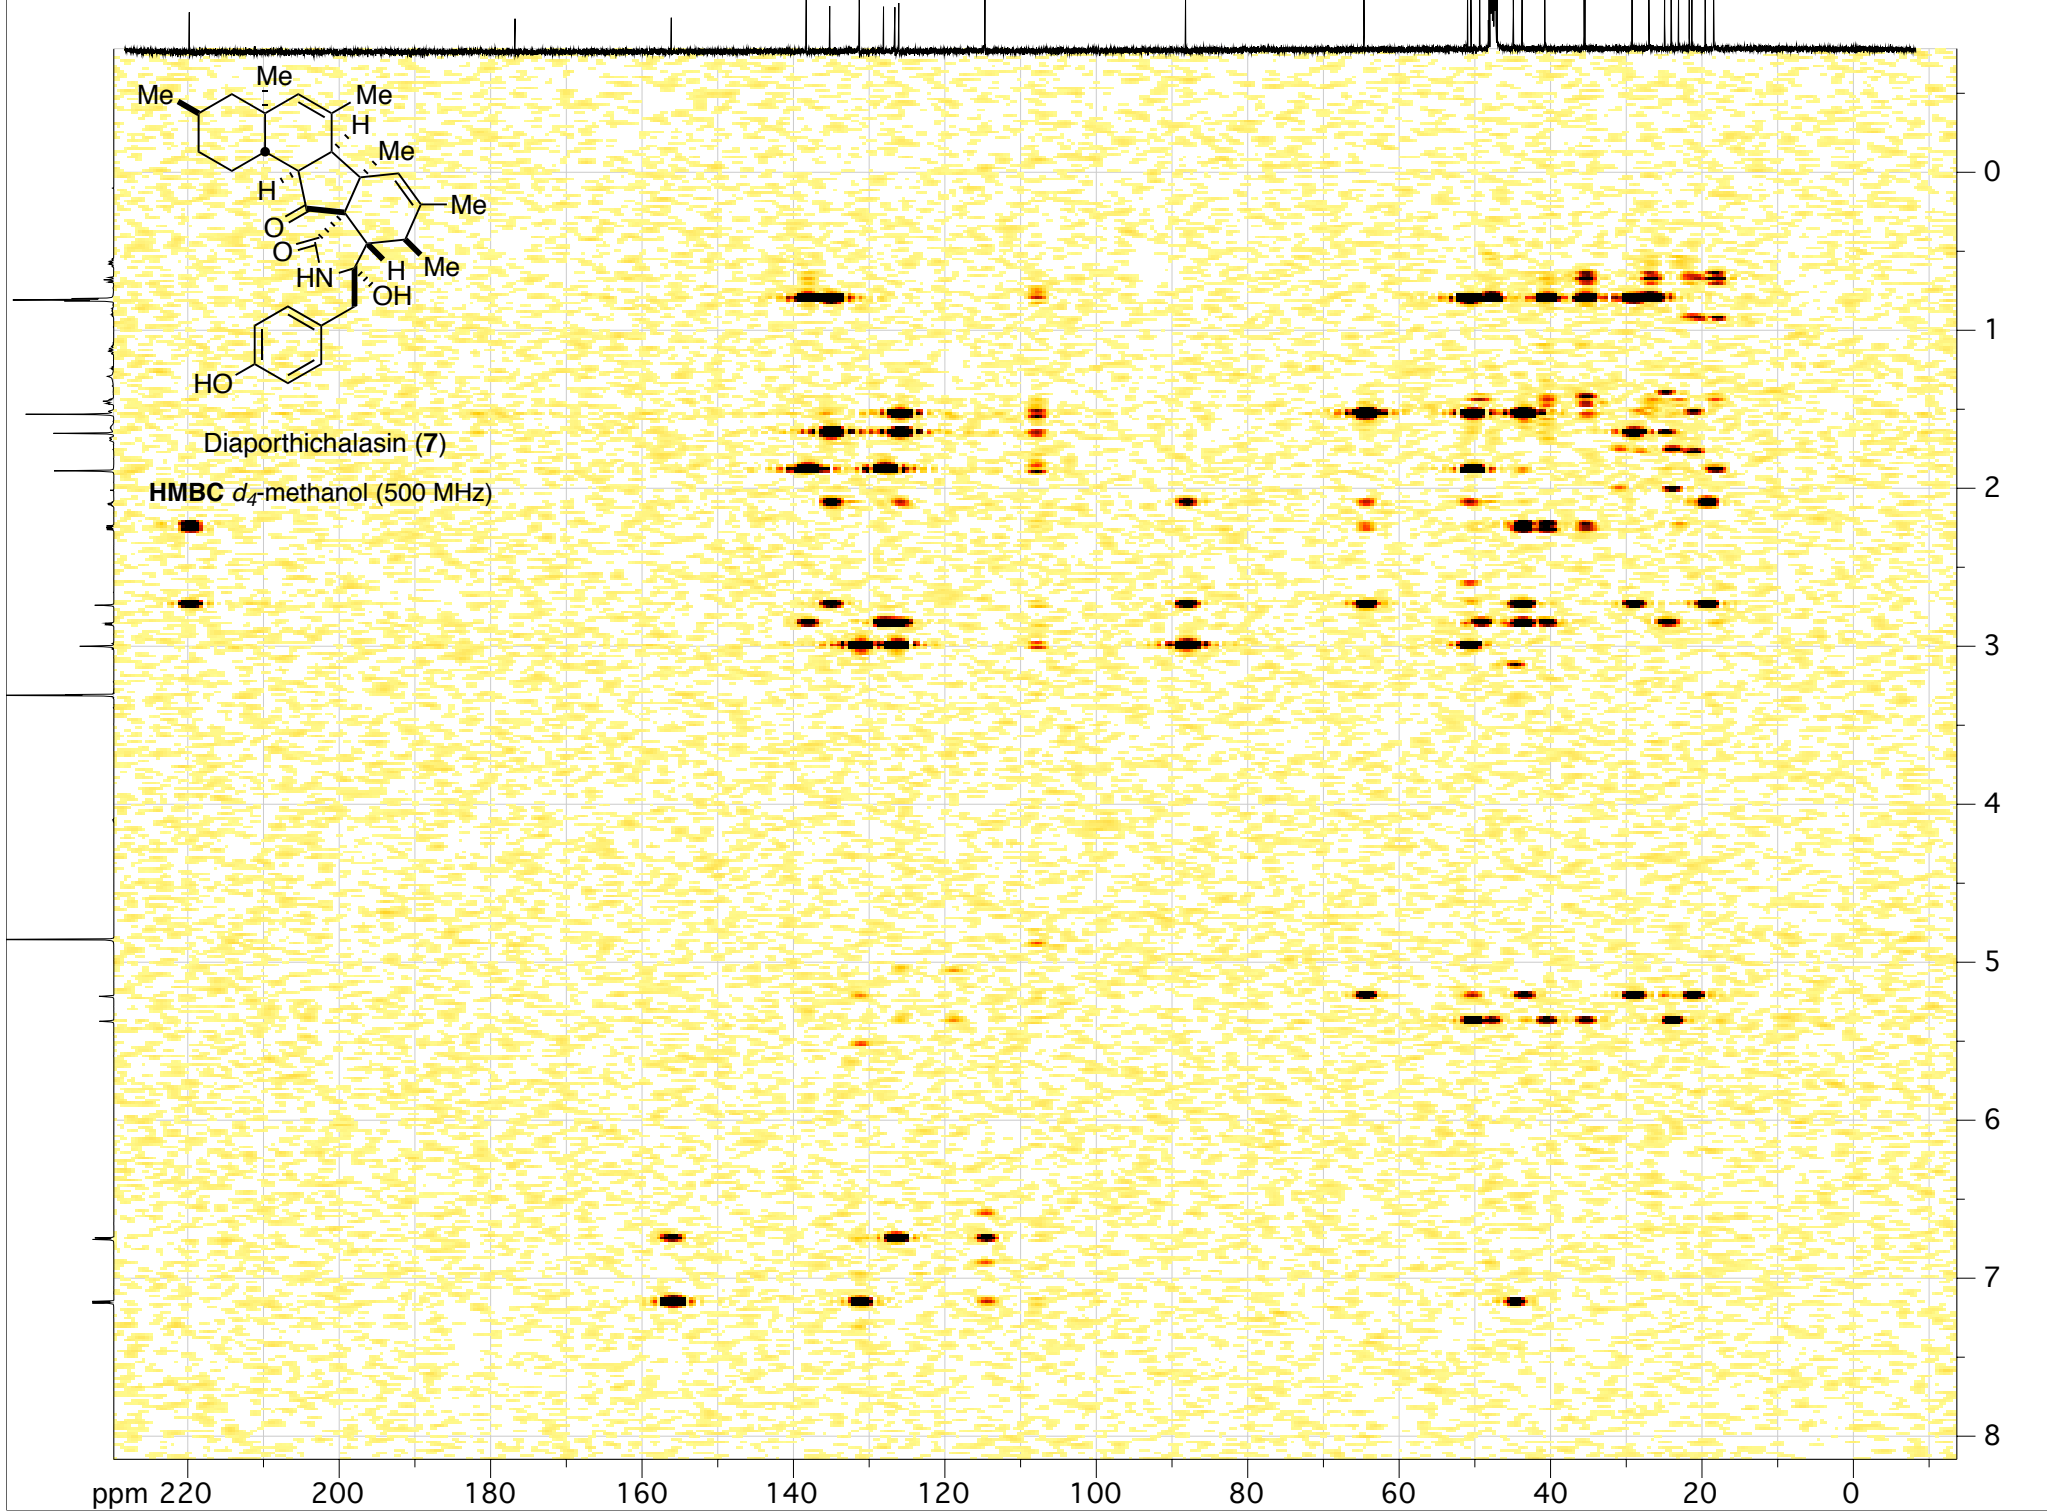

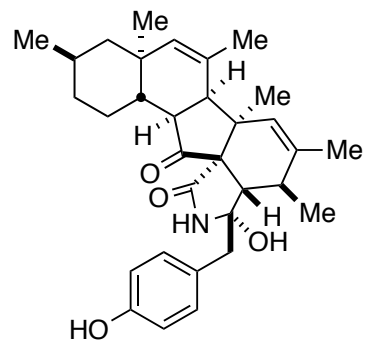

Diaporthichalasin (7)

 $d_6$ -DMSO (850 MHz)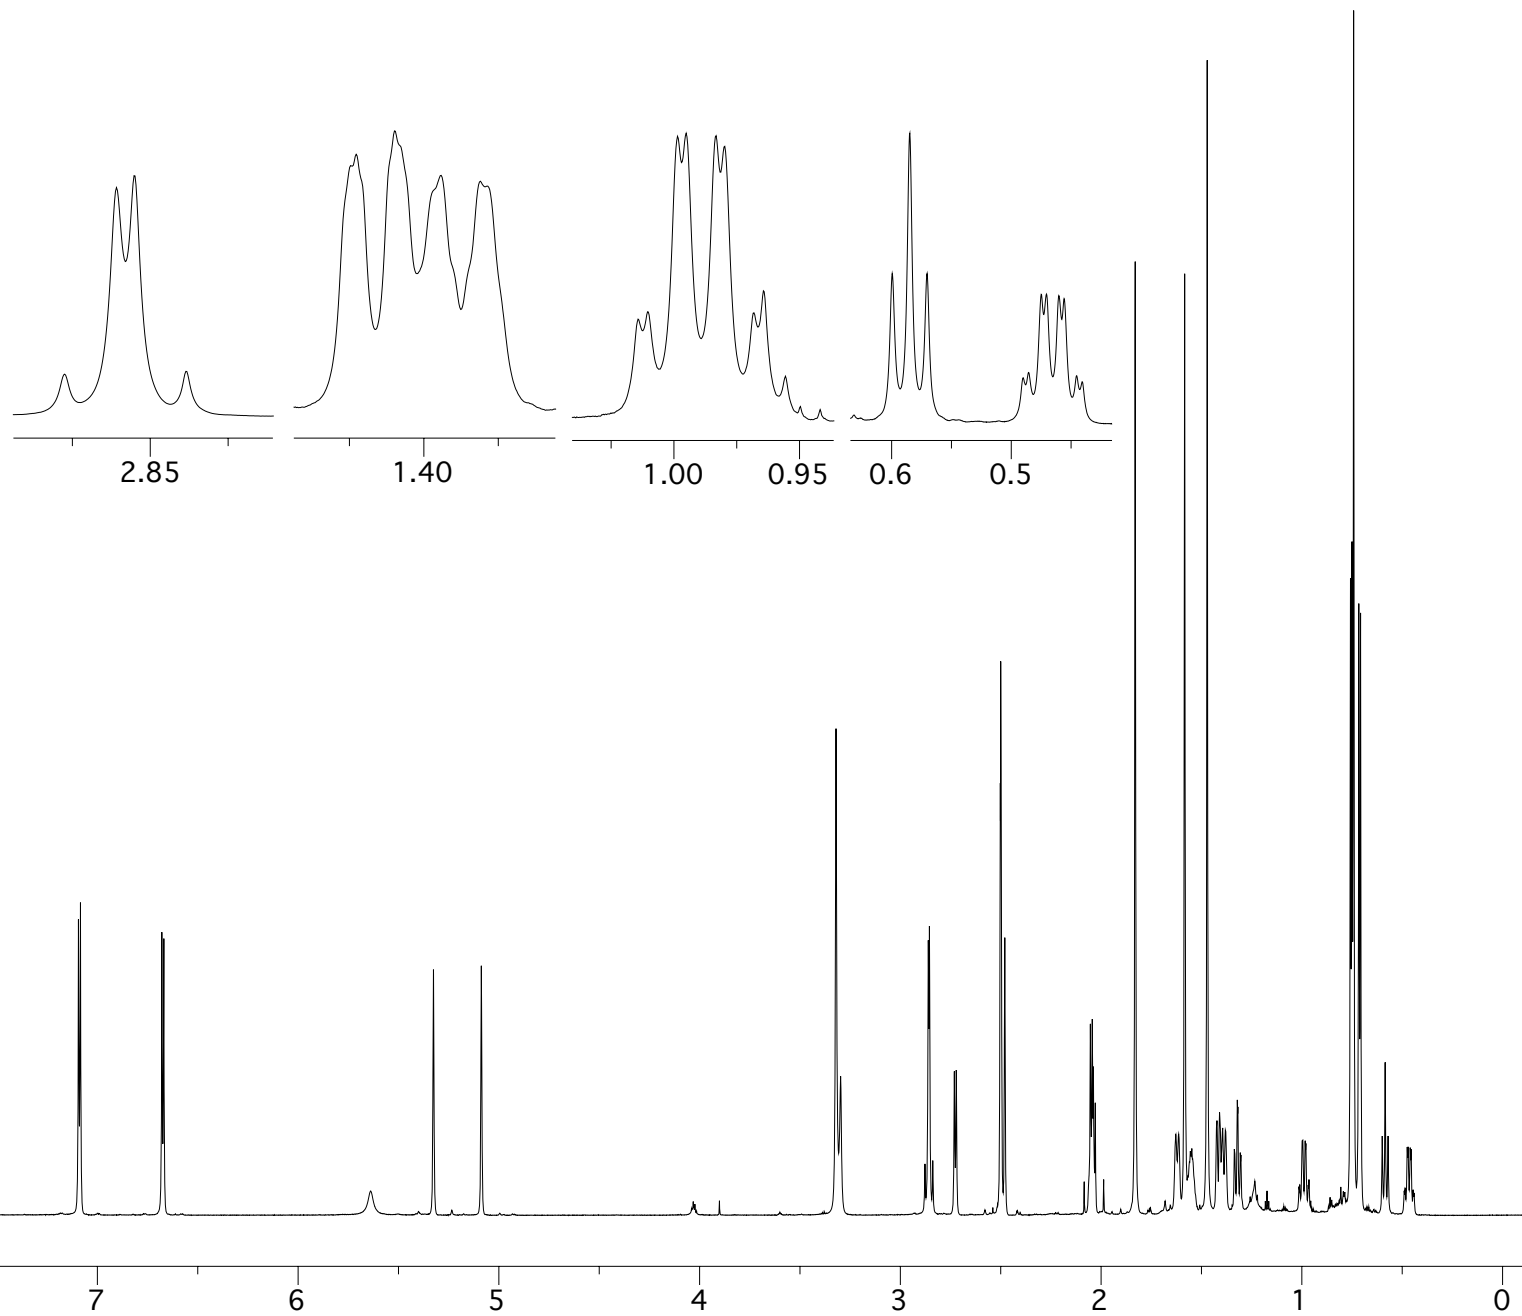

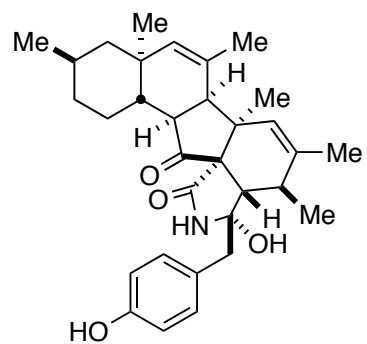

Diaporthichalasin (7)

 $d_6$ -DMSO (500 MHz)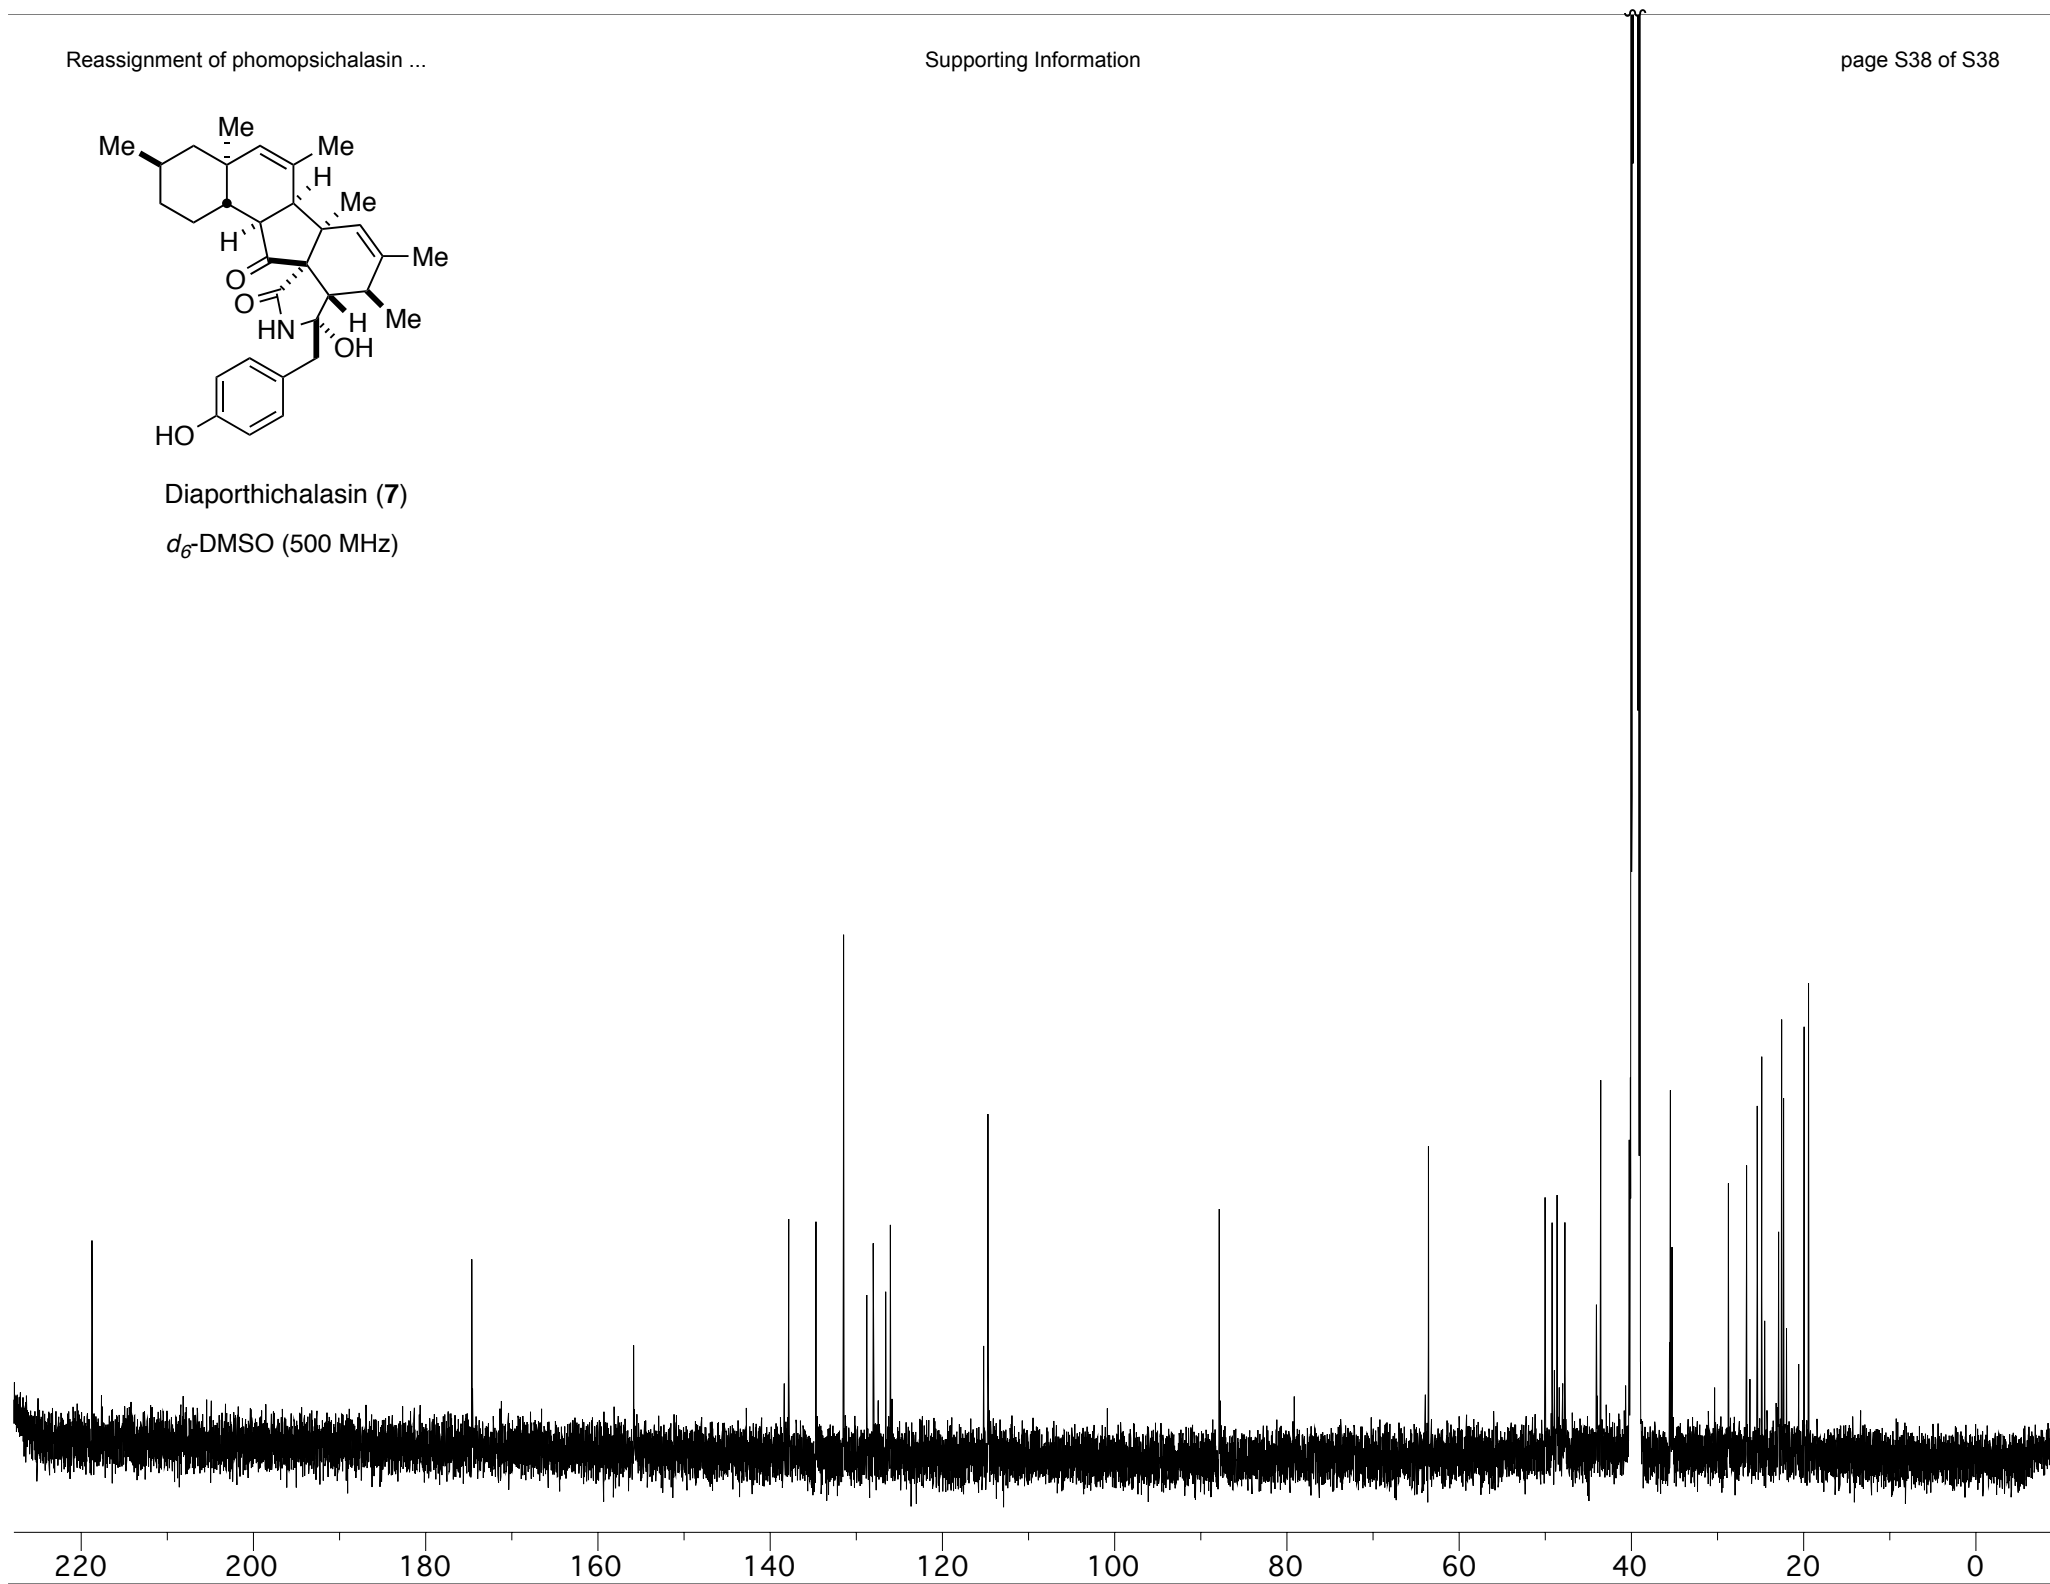

Supplement: NIHMS389138-supplement-1_si_001.pdf [file NIHMS389138-supplement-1_si_001.pdf]
